1 **Human Cytomegalovirus Drives WDR5 to the Virion Assembly Compartment to**  
2 **Facilitate Virion Assembly**

3 Bo Yang<sup>1,2</sup>, YongXuan Yao<sup>1,2</sup>, Hui Wu<sup>3</sup>, Hong Yang<sup>4,5</sup>, Xue-Hui Ma<sup>4,5</sup>, Dong Li<sup>4,5</sup>,  
4 Xian-Zhang Wang<sup>4,5</sup>, Sheng-Nan Huang<sup>4,5</sup>, Xuan Jiang<sup>1,2</sup>, Shuang Cheng<sup>4</sup>, Jin-Yan  
5 Sun<sup>4</sup>, Zhen-Li Huang<sup>6</sup>, CongJian Zhao<sup>7</sup>, Michael A. McVoy<sup>8</sup>, Jin-Hyun Ahn<sup>9</sup>, Wen-  
6 Bo Zeng<sup>4</sup>, Sitang Gong<sup>1,\*,&</sup>, William J. Britt<sup>3,\*,&</sup>, Min-Hua Luo<sup>1,2,4,5,\*,&</sup>

7 <sup>1</sup>Joint Center of Translational Precision Medicine, Guangzhou Institute of Pediatrics,  
8 Guangzhou Women and Children Medical Center, Guangzhou, China.

9 <sup>2</sup>Joint Center of Translational Precision Medicine, Wuhan Institute of Virology,  
10 Chinese Academy of Sciences, Wuhan, China.

11 <sup>3</sup>Department of Pediatrics, University of Alabama School of Medicine, Birmingham,  
12 Alabama, USA.

13 <sup>4</sup>State Key Laboratory of Virology, CAS Center for Excellence in Brain Science and  
14 Intelligence Technology, Center for Biosafety Mega-Science, Wuhan Institute of  
15 Virology, Chinese Academy of Sciences, Wuhan, China.

16 <sup>5</sup>University of Chinese Academy of Sciences, Beijing, China.

17 <sup>6</sup>Britton Chance Center for Biomedical Photonics, Wuhan National Laboratory for  
18 Optoelectronics, Huazhong University of Science and Technology, Wuhan, China.

19 <sup>7</sup>Aier School of Ophthalmology, Aier Eye Institute, Central South University,  
20 Changsha, China

21 <sup>8</sup>Department of Pediatrics, Virginia Commonwealth University School of Medicine,  
22 Richmond, Virginia, USA

23 <sup>9</sup>Department of Molecular Cell Biology, Sungkyunkwan University School of  
24 Medicine, Samsung Medical Center, Suwon, Republic of Korea.

25

26 **Running title: WDR5 Facilitates HCMV Virion Assembly**

27 **Keywords:** human cytomegalovirus; WDR5; virion structure; virion morphogenesis;  
28 virion assembly compartment; vAC.

29 **\*Corresponding author:**

30 luomh@wh.iov.cn (M.L.); sitangg@126.com

31 wbritt@peds.uab.edu.

32 <sup>&</sup>M.L., W.B. and S.G. contributed equally to this work.

33 **Abstract (156 words)**

34 We previously reported that human cytomegalovirus (HCMV) utilizes the  
35 cellular protein WDR5 to facilitate capsid nuclear egress. Here, we further show that  
36 HCMV infection drives WDR5 to the perinuclear region by a mechanism that requires  
37 viral replication and intact microtubules. WDR5 accumulated in the virion assembly  
38 compartment (vAC) and co-localized with vAC markers of gamma-tubulin ( $\gamma$ -tubulin),  
39 early endosomes, and viral vAC marker proteins pp65, pp28, and glycoprotein B (gB).  
40 WDR5 interacted with multiple virion proteins, including MCP, pp150, pp65, pIRS1,  
41 and pTRS1, which may explain the increasing WDR5 accumulation in the vAC  
42 during infection. WDR5 was then incorporated into HCMV virions and localized to  
43 the tegument layer, as demonstrated by fractionation and immune-gold electron  
44 microscopy. Thus, WDR5 is driven to the vAC and incorporated into virions,  
45 suggesting that WDR5 facilitates HCMV replication at later stage of virion assembly  
46 besides the capsid nuclear egress stage. These data highlight that WDR5 is a potential  
47 target for antiviral therapy.

48 **Importance (127 words)**

49 Human cytomegalovirus (HCMV) has a large (~235-kb) genome that contains  
50 over 170 ORFs and exploits numerous cellular factors to facilitate its replication. In  
51 the late phase of HCMV infection cytoplasmic membranes are profoundly  
52 reconfigured to establish the virion assembly compartment (vAC), which is important  
53 for efficient assembly of progeny virions. We previously reported that WDR5  
54 promotes HCMV nuclear egress. Here, we show that WDR5 is further driven to the  
55 vAC and incorporated into virions, perhaps to facilitate efficient virion maturation.  
56 This work identified potential roles for WDR5 in HCMV replication in the  
57 cytoplasmic stages of virion assembly. Taken together, WDR5 plays a critical role in  
58 HCMV capsid nuclear egress and is important for virion assembly, and thus is a  
59 potential target for antiviral treatment of HCMV-associated diseases.



## 60 **Introduction**

61 Human cytomegalovirus (HCMV) is a ubiquitous pathogen that is highly adapted  
62 to its human host. Approximately 50 to 90% of adults are infected globally (1) and in  
63 China seroprevalence is as high as 93.7% (2). About 90% of primary HCMV  
64 infections in immunocompetent individuals are either asymptomatic or mildly  
65 symptomatic. In addition, HCMV is a leading cause of congenital infections  
66 worldwide. Following primary infection, the virus remains latent and establishes life-  
67 long persistence in its host. However, HCMV can be reactivated and cause severe  
68 disease in immunosuppressed or immunodeficient individuals, such as recipients of  
69 solid organ or bone marrow transplants and AIDS patients (3-7). In these patients,  
70 HCMV infection contributes to multiple end-organ diseases, including pneumonia,  
71 gastrointestinal diseases, retinitis, central nervous system diseases, poor engraftment,  
72 severe graft-versus-host reaction, and can result in high mortality rates (8-11). In  
73 patients receiving hematopoietic stem cell transplantation, the incidence of HCMV  
74 disease is as high as 30-70% (12). In addition, congenital HCMV infection is a  
75 leading cause of birth defects and is associated with neonatal mortality and permanent  
76 developmental sequelae (13-16).

77 A characteristic feature of HCMV infection is profound remodeling of the  
78 secretory and endocytic system (Golgi, trans-Golgi network, and early endosomes) to  
79 form nested, cylindrical layers in a structure termed the virion assembly compartment  
80 (vAC) (4, 17-22), which is unique in HCMV infection when compared to other  
81 herpesviruses (23). Although not essential for virion production, vAC formation has  
82 been shown to be necessary for efficient HCMV virion assembly and maturation.  
83 Multiple viral and cellular proteins are reported to participate in vAC formation. Viral  
84 protein pUL136 is important for vAC formation and efficient virion assembly. Virus

85 mutants lacking UL136 produce less properly enveloped virions along with a larger  
86 number of dense bodies compared to wildtype virus (24). Other viral proteins pUL48,  
87 pUL94, and pUL103 are also important for vAC development (21). Interestingly,  
88 HCMV-encoded miRNAs UL112-1, US5-1, and US5-2 target host secretory pathway  
89 factors to facilitate vAC formation (25). Cellular proteins, including RhoB (22),  
90 IFITMs (23), STX5 (26), dynein (27), BiP (27, 28), Bicaudal D1 (29), Rab11 and  
91 FIP4 (30), have also been shown to localize to vAC.

92 A number of cellular proteins are relocated to the vAC and subsequently  
93 incorporated into virions. Proteomic analyses have identified over 70 viral and  
94 cellular proteins in HCMV virions. Virion-associated cellular proteins are involved in  
95 a wide range of processes and functions, including ATP binding, Ca<sup>2+</sup> signaling,  
96 signal transduction, transcription, and translation (31). WD repeat-containing protein  
97 5 (WDR5) is a highly conserved WD-40 repeat protein that is critical for regulating  
98 multiple cellular processes. The most common function of WD-repeat proteins is to  
99 serve as a rigid scaffold for protein-protein interactions, which facilitates formation  
100 and/or stabilization of multi-protein complexes (32), such as MOF (males absent on  
101 the first)-containing NSL (33), KANSL1 and KANSL2 (33), and histone H3 at lysine  
102 4 (H3K4) methyltransferases of the SET1-family (Set1A, Set1B, MLL1, MLL2,  
103 MLL3, and MLL4) (34-37). Thus, previous studies of WDR5 have focused on  
104 epigenetics (38-41); however, WDR5 can also stabilize actin architecture to promote  
105 multi-ciliated cell formation (42) and is important for embryonic stem cell  
106 reprogramming, self-renewal, and maintenance of pluripotency (43, 44).

107 The role of WDR5 in RNA virus infections has also been investigated. Upon  
108 Sendai virus infection, WDR5 is translocated from the nucleus to the mitochondria  
109 and is essential for formation of the VISA-associated complex (45). Measles virus

110 recruits WDR5 into viral inclusion bodies in the cytoplasm to facilitate virus  
111 replication (46). Our previous work showed that WDR5 promotes HCMV replication  
112 through facilitating capsid nuclear egress (47). In the present study, we further  
113 demonstrate that in HCMV-infected cells WDR5 protein levels increase in the  
114 cytoplasm and that WDR5 is translocated to and accumulates in the vAC. The  
115 accumulated WDR5 is incorporated into and localizes within the tegument layer of  
116 virions which facilitates virion morphogenesis.

117 **Results**

118 **Perinuclear accumulation of WDR5 is induced by HCMV infection.** It has been  
119 reported that cellular protein WDR5 is translocated from the nucleus to mitochondria  
120 during Sendai virus infection and to viral replication centers during measles virus  
121 infection. As both are RNA viruses (45, 46), we sought to investigate whether a  
122 corresponding WDR5 relocation occurs during HCMV infection. We initially  
123 determined if WDR5 is redistributed during HCMV infection of immortalized human  
124 embryonic lung fibroblasts (HELFs). In mock-infected HELFs, WDR5 had diffuse  
125 nuclear localization with a single small perinuclear punctum which coincided with  
126 MTOC, whereas in HCMV-infected cells WDR5 was clearly localized in a  
127 perinuclear region (Fig 1A). To exclude the possibility that WDR5 perinuclear  
128 accumulation is limited to HELFs or infection by HCMV strain Towne, similar  
129 experiments were performed with primary cell HELs and U251 glioma cells infected  
130 with HCMV strains Towne or AD169, and similar perinuclear WDR5 localization was  
131 observed (data not shown). In addition, similar perinuclear localization was also  
132 observed during murine cytomegalovirus (MCMV) infection of mouse NIH3T3  
133 fibroblasts (Fig 1B). Interestingly, this effect was not observed during infection of  
134 HELFs by other DNA viruses that have not been reported to form vAC-like structures  
135 during infection, including herpes simplex virus type 1 (HSV-1), varicella-zoster virus  
136 (VZV), adenovirus (AdV), or autographa californica multiple nuclear polyhedrosis  
137 virus (AcMNPV) (Fig 1C). These data suggest that the perinuclear accumulation of  
138 WDR5 is specifically induced by HCMV or MCMV infection.

139

140 **WDR5 perinuclear accumulation progresses with HCMV infection.** To gain  
141 further insights into changes in subcellular localization of WDR5 during HCMV

142 infection, a time course confocal microscopy study was performed from 12 to 96 hpi.  
143 Focal perinuclear accumulation of WDR5 was first observed at 24 hpi and increased  
144 as the infection progressed (Fig 2A and B).

145 To further investigate the impact of HCMV infection on WDR5 and its  
146 cytosolic/nuclear distribution, HCMV- and mock-infected cells were harvested at 96  
147 hpi and cytosolic and nuclear fractions were analyzed by immunoblot (IB). The  
148 efficiency of nuclear and cytosolic fractionation was confirmed by probing for cellular  
149 markers GAPDH and Lamin B1, which localize to cytoplasm and nuclei, respectively,  
150 as well as for viral proteins pp28 (pUL99) and IE1, which also localize to the cytosol  
151 and nucleus, respectively (Fig 2C). In mock-infected cells, WDR5 was located in the  
152 nuclear fraction and at a much lower level in the cytosol. In contrast, HCMV-infected  
153 cells contained less WDR5 protein in the nuclear fraction, while with a significantly  
154 higher level of WDR5 protein in the cytosolic fraction (Fig 2C). Previous studies have  
155 shown that nuclear membranes are significantly remodeled during HCMV infection  
156 (27). To exclude a possibility that higher cytosolic protein level of WDR5 was a result  
157 from simple diffusion, leptomycin B (LMB) was used to inhibit nuclear export.  
158 Nuclear retention of WDR5 was clearly observed and perinuclear accumulation of  
159 WDR5 was prevented by LMB treatment (Fig 2D). These data suggested that nuclear  
160 WDR5 relocated to the cytoplasm during HCMV infection is not due to diffusion.

161

162 **WDR5 perinuclear accumulation requires viral replication.** To determine the  
163 kinetic class of viral gene expression required to alter WDR5 localization, HELFs  
164 were incubated with HCMV virions that were UV-irradiated to block all *de novo* viral  
165 gene expression or with infectious virions in the presence of the viral DNA  
166 polymerase inhibitors ganciclovir (GCV) or phosphonoacetic acid (PAA) to block

167 viral DNA synthesis and late gene expression. Immunoblot at 72 hpi confirmed that  
168 UV irradiation blocked expression of all viral proteins tested, including IE1/IE2, the  
169 early/late protein pUL44, and the true late glycoprotein B (gB). In contrast, infection  
170 in the presence of either GCV or PAA had no effect on IE1, while IE2 and pUL44  
171 levels were reduced, and, as predicted for a late protein, gB expression was fully  
172 blocked (Fig 3A). WDR5 protein and mRNA levels were compared during HCMV  
173 infection with or without GCV or PAA treatment. Compared to the mock-infected  
174 group, both WDR5 protein (Fig 3A) and mRNA levels (Fig. 3B) were elevated in  
175 virus-infected cells in both presence and absence of GCV or PAA. In HCMV-infected  
176 cells WDR5 protein levels were not significantly altered by GCV or PAA treatment.

177 We further investigated whether WDR5 perinuclear accumulation is altered by  
178 treatment of GCV or PAA. Characterization of replicate cultures by  
179 immunofluorescence revealed that WDR5 localization was similar to that in mock  
180 infected cells when virions were inactivated by exposure to UV. Both GCV and PAA  
181 dramatically inhibited perinuclear accumulation of WDR5 and perinuclear foci  
182 formation (Fig 3C). Although the expression of WDR5 was elevated by virus  
183 infection in the presence of GCV and PAA (Fig 3A and 3B), the perinuclear-  
184 accumulated WDR5 was still dramatically inhibited. These results indicated that  
185 WDR5 perinuclear accumulation and perinuclear foci formation are not due to  
186 increasing WDR5 levels, but are due to relocalization of WDR5 by a process that  
187 requires HCMV DNA synthesis and/or *de novo* synthesis of viral late proteins.

188

189 **Accumulation of WDR5 in perinuclear vACs requires microtubule**  
190 **polymerization.** The location, morphology, and dependence on viral late gene  
191 expression suggested that WDR5 may be accumulating in the vAC. To confirm this

192 possibility, colocalization of WDR5 with the vAC markers was examined. At 72 hpi,  
193 WDR5 accumulated in a juxtannuclear region in cells with kidney-shaped nuclei that  
194 also displayed cytoskeletal filaments ( $\alpha$ -tubulin) radiating out to the rim of the  
195 plasma membrane (Fig 4A, a to d). This region also co-localized with gamma-tubulin  
196 (Fig 4A, e to h), which is the marker of the microtubule organizing center (MTOC)  
197 (48). This juxtannuclear region was wrapped around by a tightly nested ring of Golgi  
198 elements (anti-58K, Fig 4A, i to l) and colocalized well with early endosome marker  
199 EEA1 (Fig 4A, m to p). These characteristics have all been reported for the vAC (18),  
200 and confirmed that WDR5 accumulates in the vAC.

201 To determine if WDR5 accumulation in the vAC was microtubule dependent  
202 similar to virion structural proteins such as pp150 (29), replicate cultures to those  
203 shown in Fig 4A were treated with nocodazole (NOC) to disrupt microtubule  
204 polymerization (49) and analyzed by IFA after 20 min, 4h, or 6h of NOC treatment.  
205 While  $\gamma$ -tubulin was less sensitive to NOC treatment (Fig 4B, c and g),  $\alpha$ -tubulin  
206 filaments became fragmented and punctate in distribution after 4-6 h NOC treatment  
207 (Fig 4B, k and o). Concomitant with the fragmentation of microtubules, WDR5  
208 perinuclear foci dispersed (Fig 4B, f, j and n).

209 In HCMV-infected cells, the vAC is enriched in various viral capsid, tegument,  
210 and envelope proteins (17, 18). To further confirm that accumulation of WDR5 in  
211 perinuclear foci resulted from recruitment of WDR5 to the vAC, infected cells were  
212 co-stained for WDR5 and viral vAC markers, including the tegument proteins pp28  
213 and pp65 and the envelope glycoprotein gB (18). As shown in Fig 4C, pp28, pp65,  
214 and gB closely colocalized with WDR5. A three-dimensional (3-D) reconstruction  
215 from Z-stack images of the cell shown in the bottom panel of Fig 4C clearly

216 demonstrated the colocalization of WDR5 with vAC marker gB. All these data  
217 indicated that WDR5 was driven to vAC during HCMV infection.

218

219 **WDR5 plays a crucial role in vAC formation and virion morphogenesis.**

220 To further explore whether WDR5 contributes to formation of vAC, we used a  
221 previously described pair of HELF-derived cell lines, one in which WDR5 is knocked  
222 down by shRNA (KD) and one expressing an irrelevant control shRNA (Ctl) (47). In  
223 KD cells, WDR5 knockdown altered formation and/or morphology of vAC, as  
224 determined by staining for gB. Irregular vAC exhibited multiple juxtannuclear foci,  
225 while in some infected cells no distinct vAC was observed (Fig 5A). Since proper  
226 vAC formation is necessary for efficient HCMV virion assembly and maturation. We  
227 further examine the virion morphogenesis by TEM in Ctl and KD cells. We  
228 previously have reported that knockdown of WDR5 dramatically decreased the  
229 number of matured virions in the vAC (47). As shown in Fig 5B (f to k), knockdown  
230 of WDR5 resulted in decrease of mature virions and distinct defects in virion  
231 maturation (white arrow). Nearly 39% of viral particles lacked envelope in KD cells  
232 (Fig. 5C). Inhibition of viral replication (Fig 3A and C) and disrupting microtubules  
233 (Fig 4B) both affect WDR5 accumulation in vAC, knock down WDR5 by shRNA  
234 altered formation and/or morphology of vAC (Fig 4D). All these data strongly support  
235 that WDR5 plays a crucial role in vAC formation and virion morphogenesis.

236

237 **The N-terminal domain of WDR5 is critical for WDR5 accumulation in vAC.**

238 The functional implementation of a protein depends on its subcellular distribution. To  
239 dissect which domain of WDR5 is critical for its accumulation in the vAC, a serial  
240 mutant of WDR5 were constructed based on its structure. WDR5 contains seven



241 typical WD40 repeat domains (WD1 to WD7, Fig 6A), each WD40 repeat motif  
242 forms a blade  $\beta$ -propeller (37). A series of WDR5 deletion mutants were constructed  
243 as illustrated in Fig 6A. The distribution of Flag-tagged full-length WDR5 and the  
244 indicated mutants were determined. All the WDR5 constructs were transfected into  
245 HELF cells for 24 h, followed by either mock- or HCMV-infection at an MOI of 3.  
246 The full-length WDR5 showed a predominant nuclear localization in mock-infected  
247 HELFs, which is consistent with the results for endogenous WDR5 described above,  
248 accumulated in vAC in infected cells. Two mutants, Flag-aa1-82 and Flag-aa1-42,  
249 which retained the N-terminal amino acids 1-42, showed pan-cellular distribution  
250 upon mock-infection but still localized to vAC upon HCMV infection. In contrast,  
251 mutants lacking the amino acids 1-42 displayed mainly nuclear localization (*e.g.*,  
252 Flag-aa43-334) or pan-cellular distribution, and were not relocalized to vAC during  
253 HCMV infection. Taken together, these data indicate that the N-terminal amino acids  
254 1-42 of WDR5 are critical for WDR5 accumulation in vACs.

255

256 **WDR5 co-fractionates with HCMV particles.** Since WDR5 accumulated in the  
257 vAC, we next sought to determine if WDR5 is incorporated into viral particles.  
258 HELFs were mock- or HCMV-infected and cells were lysed by sonication. Intra- and  
259 extracellular particles were combined and then analyzed by iodixanol density gradient  
260 centrifugation, as illustrated in Fig 7A. Fractions were collected from top to bottom of  
261 the gradient, and analyzed by immuno-dot-blot for the presence of WDR5, gB, or  
262 pUL48, and for viral DNA by qPCR. WDR5 was undetectable in all fractions derived  
263 from mock-infected cultures (Fig 7B). In contrast, WDR5 was detected in fractions  
264 derived from HCMV-infected cultures and fractions with peak levels of WDR5

265 corresponded with those containing peak levels of gB, pUL48, and viral DNA (Fig 7B  
266 and 7C), suggesting that WDR5 is associated with HCMV particles.

267

268 **WDR5 is present in the tegument layer of HCMV virions.** To determine whether  
269 WDR5 is incorporated into virions, extracellular virions were purified from infected-  
270 cell culture supernatants as described previously (50). The purified virions were then  
271 either mock treated or treated with 2% Triton X-100 at room temperature for 1 h,  
272 layered onto a 10% to 50% iodixanol continuous gradient, and ultra-centrifuged at  
273  $100,000 \times g$  for 2 h. Fractions were collected from top to bottom of the gradient and  
274 analyzed by IB for WDR5, structural viral proteins, including major capsid protein  
275 (MCP), tegument proteins pp28, pp65, pp71, pIRS1, pTRS1, pUL48, and the  
276 envelope glycoprotein B (gB), as well as the non-structural viral proteins IE1/2 and  
277 pUL44. IE1/2 and pUL44 were present in infected-cell lysates but were not in any  
278 gradient fractions, confirming effective separation of virions from infected-cells (Fig  
279 8A). In gradient fractions of mock-treated virions, fractions 9 and 10 contained peak  
280 levels of MCP, tegument proteins, gB, and WDR5 (Fig 8A, upper panel). In gradient  
281 fractions of Triton X-100-treated virions, peak levels of MCP and tegument proteins  
282 shifted to fraction 11, while the majority of gB and a fraction of the outer tegument  
283 protein pp28 shifted to lower density fractions and no longer co-fractionated with  
284 MCP (Fig 8A, lower panel). These results suggested that Triton X-100 treatment  
285 removed the envelope and some of the outer tegument layers from the virion particles.  
286 The finding that WDR5 remained predominantly in fraction 11 following Triton X-  
287 100 treatment (Fig 8A, lower panel) suggested that WDR5 was either associated with  
288 the inner tegument layers or was directly attached to capsids.

289 Immunogold labeling was next used to further examine WDR5 association with  
290 virions. Purified virions were again either mock treated or treated with Triton X-100  
291 (as described above) to allow access of antibodies to proteins in the inner layers of  
292 treated viral particles. The particles were then labeled with mAbs to gB, pp28, or  
293 WDR5 followed by immunogold labeling and detection by electron microscopy.  
294 Consistent with the established presence of gB in the virion envelope, gold particles  
295 were observed decorating the surface of mock-treated particles labeled using anti-gB  
296 antibody (Fig 8B, panel a). In contrast, and consistent with the known localization of  
297 pp28 in the tegument of the virion, gold particles were observed decorating the  
298 surface of Triton X-100-treated particles labeled using anti-pp28 antibody (Fig 8B,  
299 panel b). Immunogold labeling with anti-WDR5 antibody was similar to that of pp28,  
300 suggesting that WDR5 was localized within the tegument layer (Fig 8B, panel c).  
301 Moreover, capsids purified from infected-cell nuclei (before nuclear egress) or from  
302 virions purified from culture supernatants both contained WDR5 (Fig. 8C).

303 Taken together, these results indicate that WDR5 is associated with capsids  
304 before nuclear egress, translocates to and accumulates in vAC, finally incorporates  
305 into virion tegument layer, which is critical for virion morphogenesis.

306

307 **WDR5 interacts with viral structural proteins.** The above findings indicate  
308 that WDR5 is associated with capsids before nuclear egress, then accumulates in the  
309 vAC, and is ultimately incorporated into virions. We therefore infer that WDR5 likely  
310 interacts with one or more viral structural proteins. To test this hypothesis, Flag-  
311 tagged WDR5 was overexpressed in HELF cells followed by mock- or HCMV-  
312 infection for 96 h. Cell lysates were immunoprecipitated (IP) with anti-Flag antibody  
313 and subjected to SDS-PAGE and Coomassie staining. There were four different

314 distinct protein species (Fig. 9A, red arrows) in the viral-infected immunoprecipitates  
315 when compared to the mock control. These four species were further analyzed by  
316 liquid chromatography-tandem mass spectrometry (LC-MS/MS) to identify and  
317 quantify the proteins. As shown in Fig 9B, viral structural proteins, including MCP,  
318 pp150, pp65, pIRS1, and pTRS1, were identified in the immunoprecipitates.

319 To confirm WDR5-viral protein interactions, HEK293T cells were co-transfected  
320 with plasmids expressing HA-tagged WDR5 and each of the candidate viral protein  
321 interactors (Myc-MCP, Flag-pp65, Myc-pp150, Flag-pIRS1, or V5-pTRS1). Each  
322 viral protein was immunoprecipitated using their respective epitope tags and the  
323 immunoprecipitates were then probed for WDR5 by IB for the HA tag. WDR5-HA  
324 could be detected in IPs for MCP, pp65, pp150, pIRS1, and pTRS1 but not for pp28  
325 or the IgG controls (Fig. 9C-H). Taken together, these results indicate that WDR5  
326 interacts with viral structural proteins, which explains its accumulation in vAC and its  
327 role in facilitating mature virion morphogenesis.

328

329

## 330 Discussion

331 During the course of a viral infection, cellular proteins can be incorporated into  
332 viral particles. For example, both LC-MS/MS and multidimensional protein  
333 identification technology (MudPIT) have been used to identify components of  
334 influenza virions, and while seventeen virion-associated cellular proteins were  
335 identified by both methods, six others were identified only with the LC-MS/MS  
336 analysis and 13 were identified only with MudPIT analysis (51), suggesting that  
337 multiple approaches may be necessary to identify all of the virion-associated cellular  
338 factors. In some cases, cellular proteins are incorporated randomly and have not been  
339 shown to play a role in the infectivity of the mature virion, whereas in other cases  
340 cellular proteins are selectively incorporated into virions through specific interactions  
341 with virion structural proteins or the viral genome. With regard to HCMV, LC-  
342 MS/MS has identified over 70 host proteins in virions. These cellular proteins  
343 function in diverse processes, including ATP and Ca<sup>2+</sup> binding, chaperones,  
344 cytoskeleton, enzymatic activities, glycolysis, protein transport, signal transduction,  
345 transcription, and translation (31). Some have been reported to function during certain  
346 stages of the infection process, suggesting that these proteins are incorporated into the  
347 virion to facilitate virus infectivity and replication (31). Others may serve to evade  
348 host immune mechanisms; for example, in the late stage of infection intracellular viral  
349 DNA sensors and restriction factors such as IFI16 traffic to vAC where they are  
350 incorporated into mature virions (52).

351 Previously, we found that HCMV infection increases WDR5, and WDR5  
352 facilitates capsid nuclear egress (47). In the present study we analyzed the cellular  
353 distribution of WDR5 and observed that the distribution of WDR5 was altered by  
354 HCMV infection, as it accumulated in vAC. Treatment with viral replication

355 inhibitors (GCV or PAA) and microtubule polymerization inhibitor (NOC)  
356 significantly prevented WDR5 accumulation in the vAC. Inhibition of viral  
357 replication, including viral DNA replication and expression of late viral structure  
358 proteins, impairs formation of the vAC. The vAC formation is also dissolved by  
359 microtubule polymerization inhibitor. Under both conditions, the protein levels of  
360 WDR5 are not significantly changed, but vAC formation is dramatically impaired.  
361 Thus, relocation and accumulation of WDR5 in vAC requires HCMV late gene  
362 expression and depends on microtubule polymerization. Taken together, these  
363 findings suggest that WDR5 accumulation in the vAC occurs as a result of a specific  
364 HCMV-dependent mechanism, although this mechanism remains undefined.

365 In order to determine if WDR5 was incorporated into virions, we analyzed intra-  
366 and extracellular viral particles and purified virions for the presence of WDR5 after  
367 purification of virion particles by density gradient centrifugation. In each case WDR5  
368 cofractionated with markers for virions or capsid particles but was not detected in  
369 gradient fractions derived from uninfected cultures. Furthermore, we showed that  
370 WDR5 interacts with virion tegument proteins pp65, pIRS1, and pTRS1. Therefore,  
371 we propose that WDR5 resides within the tegument layer of HCMV virions. To  
372 investigate the location of WDR5 in virions, we treated virions with Triton X-100, a  
373 detergent that solubilizes virion membranes. Following Triton X-100 treatment, a  
374 significant amount of WDR5 remained associated with the detergent treated virions.  
375 In addition, immuno-gold electron microscopy indicated that WDR5 was present  
376 within virions and was localized to the tegument. These data, together with our  
377 previous findings that WDR5 plays a role in the assembly of the NEC and capsid  
378 egress, suggest that during nuclear egress WDR5 may initially enter the perinuclear  
379 cisterna together with capsids and travels along with capsids to the cytoplasm and

380 vAC (Fig 10). WDR5 then interacts with viral structural proteins (*e.g.*, MCP, pp150,  
381 and pp65), thereby accumulating in vAC; finally, WDR5 is packaged into virions  
382 along with numerous tegument proteins and glycoproteins.

383 In summary, the data provided in this study suggest a dual role for WDR5 during  
384 HCMV assembly. During nuclear egress, it modulates NEC assembly and facilitates  
385 capsid nuclear egress. Subsequently, it translocates along with capsid from the  
386 nucleus into the cytoplasm by interacting with MCP; it accumulates in vAC by  
387 interacting with multiple late viral structures proteins and is incorporated into virions.  
388 Since WDR5 interacts with multiple viral structure proteins, it could function during  
389 virion morphogenesis by stabilizing multi-protein complexes. WDR5 plays a critical  
390 role in capsid nuclear egress, vAC formation, and virion assembly. Our findings  
391 further demonstrate that HCMV manipulates existing cellular mechanisms, including  
392 the localization of cellular proteins, to facilitate its replication, assembly, and egress.  
393 These data highlight that WDR5 is a potential new target for antiviral drug  
394 development.

395 **Acknowledgements**

396 We thank Dr. Hua Zhu from Rutgers-New Jersey Medical School for providing VZV  
397 Oka strain, Qiyi Tang from Howard University College of Medicine for providing  
398 MCMV K181 strain, and Drs. Zhengli Shi and Zhihong Hu from Wuhan Institute of  
399 Virology, CAS, for providing GFP-expressing AdV and AcMNPV, respectively. We  
400 thank Dr. Wade Gibson from Johns Hopkins University for providing pUL48 rabbit  
401 serum, Dr. Yan Zhou from Wuhan University for providing  $\gamma$ -Tubulin antibody, and  
402 Dr. Thomas E. Shenk from Princeton University for providing pIRS1 and pTRS1  
403 antibodies. We thank Dr. Adam P. Geballe from Fred Hutchinson Cancer Research  
404 Center, University of Washington for providing pTRS1 expressing plasmid. We thank  
405 Ding Gao, Anna Du, and Pei Zhang of The Core Facility, Wuhan Institute of Virology,  
406 CAS, for technical support of electron microscopy.

407

408 **Conflict of interest**

409 The authors declared that they have no conflicts of interest to this work.

410

411 **Funding**

412 This work was supported by grants from the National Natural Science Foundation of  
413 China (81620108021, 81427801, 31900137 and 31900138), and China Postdoctoral  
414 Science Foundation (2019M652846 and 2019M662851).

415



## 416 **Materials and Methods**

417 **Ethics statement.** Human embryonic lung fibroblast cells (HELs) were isolated from  
418 postmortem embryo lung tissue. The original source of the anonymized tissues was  
419 Zhongnan Hospital of Wuhan University (China). The cell isolation procedures and  
420 research plans were approved by the Institutional Review Board (IRB)  
421 (WIVH10201202) according to the Guidelines for Biomedical Research Involving  
422 Human Subjects at Wuhan Institute of Virology, Chinese Academy of Sciences. The  
423 need for written or oral consents was waived by the IRB (53).

424

425 **Cells and cell culture.** HELs were isolated and maintained as described previously  
426 (53). HELF, kindly provided by Dr. Jason J. Chen at Columbia University, are human  
427 embryonic lung fibroblasts that have been retrovirally transduced with human  
428 telomerase (hTERT). Clonal cell lines isolated from HELFs that were transduced with  
429 WDR5 shRNA (KD) and scrambled shRNA (Ctl) were described previously (47).  
430 Both HELs and HELF were cultured in Minimum Essential Medium (MEM,  
431 Cat.#41500-034, Thermo Fisher) supplemented with 10% fetal bovine serum (FBS,  
432 Cat.#10099-141, Thermo Fisher) and penicillin-streptomycin (100 U/ml and 100  
433 µg/ml, respectively; Cat.#15140-122, Thermo Fisher). Human embryonic kidney  
434 293T cells (HEK293T) were purchased from ATCC (CRL-11268) and cultured in  
435 Dulbecco's Modified Eagle Medium (DMEM; Cat.#11995-123, Thermo Fisher)  
436 supplemented with 10% FBS and penicillin-streptomycin, as above. Cells were  
437 cultured at 37 °C in a humidified atmosphere containing 5% CO<sub>2</sub>.

438

439 **Viruses.** HCMV Towne strain (ATCC-VR 977) was used in this study. HSV-1 strain  
440 H129 expressing GFP was previously constructed by our laboratory (54). VZV Oka

441 strain expressing GFP (55) was a gift from Dr. Hua Zhu, Rutgers-New Jersey Medical  
442 School, and MCMV strain K181 was a gift from Qiyi Tang, Howard University  
443 College of Medicine, USA. GFP-expressing AdV and AcMNPV were provided by Dr.  
444 Zhengli Shi and Zhihong Hu, Wuhan Institute of Virology, Chinese Academy of  
445 Sciences, respectively.

446

447 **Plasmid construction.** Primers used for plasmid construction are shown in Table 1.  
448 WDR5 cDNA (GenBank #NM\_017588) was derived by reverse transcription as  
449 described previously (47). The cDNA was PCR amplified then cloned into either  
450 *EcoRI/XhoI*-restricted pCMV-HA to generate plasmid HA-WDR5 or into  
451 *XbaI/EcoRI*-restricted pCDH-Flag to generate Flag-WDR5. The *UL83* ORF encoding  
452 pp65 and *IRS1* ORF encoding pIRS1 were PCR amplified from Towne-BAC genome  
453 (56) and cloned into *BamHI/KpnI*-restricted pXJ40-Flag to generate plasmid Flag-  
454 pp65 and Flag-pIRS1, respectively. The *UL99* ORF encoding pp28 was PCR  
455 amplified and cloned into *BamHI/XbaI*-restricted pcDNA3.1-V5/6×His to generate  
456 plasmid pp28-6×his. The *UL86* ORF encoding MCP and *UL32* ORF encoding pp150  
457 were amplified from Towne-BAC genome (56) and inserted into a vector with 6×Myc  
458 by cloning recombination (ClonExpress II One Step Cloning Kit, Cat.#C112,  
459 Vazyme). The *TRS1* ORF encoding pTRS1 fused with a carboxyl-terminal 6×His  
460 epitope tag and V5 tag was a gift from Dr. Adam P. Geballe, Fred Hutchinson Cancer  
461 Research Center and University of Washington, which have been previously  
462 described as pEQ981 (57). All the primers used in this study are listed in Table 1.

463

464 **Transient transfection.**  $1.5 \times 10^6$  HEK293T cells were seeded into 100-mm dishes.  
465 The next day the medium was changed 2h prior to transfection via  $\text{Ca}_2(\text{PO}_4)_2$

466 precipitation with 10 µg HA-WDR5 along with 10 µg pp28-his, Myc-MCP, Flag-  
467 pp65, Myc-pp150, Flag-pIRS1, or pTRS1-V5, as described previously (53).  $2 \times 10^6$   
468 HELFs were seeded onto coverslips in 12-well plates. Medium was changed at 2h  
469 prior to transfection in the next day. Plasmids (1.2 µg for each well) expressing full-  
470 length and truncated WDR5 were transfected into HELFs using Lipofectamine 2000  
471 reagent (Cat.#11668-019; Thermo) according to the manufacturer's instructions.

472

473 **Quantitative reverse transcriptase PCR (qRT-PCR).** HELFs were infected at an  
474 MOI of 3 and harvested at the indicated times post infection. A total of  $1 \times 10^6$  cells  
475 were used for total RNA extraction using RNAiso Plus reagent (Cat.#9109, TaKaRa),  
476 followed by treatment with 10 U of recombinant DNase I (Cat.#2270A, TaKaRa) to  
477 remove residual DNA. One µg RNA of each sample was reverse transcribed with a  
478 RevertAid H Minus first-strand cDNA synthesis kit (Cat.#K1631, Fermentas) with  
479 random primers. Then qPCR was performed on a real-time thermocycler (Bio-Rad;  
480 Connect) using SYBR green PCR master mix (Cat.#4309155, Applied Biosystems) in  
481 20 µl reactions for 40 PCR cycles as described previously (58). The PCR primers for  
482 WDR5 were: 5'-GGTGGGAAGTGGATTGTGTC-3' and 5'-  
483 GCAGCAGAGGCGATGATG-3'. The PCR primers for GAPDH were: 5'-  
484 GAGTCAACGGATTTGGTCGT-3' and 5'-GACAAGCTTCCCGTTCTCAG-3'.

485

486 **IB.** Cells were harvested in cell lysis buffer (Cat.#P0013, Beyotime) containing  
487 protease inhibitor cocktail (Cat.#04693159001, Roche) and homogenized by  
488 ultrasonication. Protein concentrations of lysates were determined by Bradford assay  
489 (Cat.#500-0205, Bio-Rad). After boiling with loading buffer, cell lysates containing  
490 equal protein amounts were separated by SDS-PAGE and transferred to PVDF

491 membranes (Cat.#ISEQ00010, Millipore). Membranes were sequentially probed with  
492 primary antibodies and appropriate peroxidase-conjugated secondary antibodies. All  
493 antibodies used for IB are listed in Table 2. The viral antibodies for IE1 (59), pUL48  
494 (60), pIRS1 (61), pTRS1 (61) and MCP (62) and mIE1 (63) were described  
495 previously. Blots were developed using the SuperSignal West Femto  
496 Chemiluminescent Substrate (Cat.#34095, Thermo Fisher), signals were detected  
497 using a FluorChem HD2 System (Alpha Innotech), and quantification was performed  
498 using ImageJ software (NIH).

499

500 **IP.** HEL cells were mock infected or infected with HCMV strain Towne at an MOI of  
501 3 and harvested at 72 hpi. Cells were lysed in IP lysis buffer (Cat.#P0013, Beyotime)  
502 for 1h at 4 °C then centrifuged at 120,000 × g for 5 min to remove cell debris.  
503 Samples were mock treated or nuclease treated by incubation with 10 mM MgCl<sub>2</sub>, 100  
504 µg/ml Dnase I (Cat.#2270A, TaKaRa) and 100 µg/ml Rnase A (Cat.#AC118,  
505 OMEGA) for 1 h at 37 °C. IP was performed by incubation of the resulting lysates  
506 overnight at 4 °C with mouse monoclonal anti-Flag antibody (Cat.# F3165, Sigma) or  
507 with normal mouse IgG (Cat.#A7028, Beyotime). Protein A+G agarose beads  
508 (Cat.#P2012, Beyotime) were added and incubated for 3 h at 4 °C and then washed  
509 five times with lysis buffer. Loading buffer was added and samples were boiled for 5  
510 min before separation by SDS-PAGE followed by IB for detection of WDR5, pp65, or  
511 pp28, as described above.

512

513 **IFA.** HELFs or HFFs were seeded onto coverslips and after attachment infected with  
514 HCMV at an MOI of 3. Coverslips were collected at the indicated times post infection  
515 and fixed with 4% paraformaldehyde. Target proteins were detected by incubation

516 with primary antibodies and appropriate secondary antibodies, as listed in Table 2,  
517 and as described previously (47). Nuclei were counterstained with DAPI (Cat.#D9542,  
518 Sigma). Images were obtained using a UltraVIEW VoX (Perkin Elmer) spinning disk  
519 laser confocal scanning microscope. 3D z-axis image stacks were acquired with 0.2-  
520  $\mu\text{m}$  spacing and 3D modeling was performed using Volocity 5.5 software (Perkin  
521 Elmer). Images were median-filtered to reduce noise and contrast was enhanced to  
522 improve resolution.

523

524 **Cytosolic and nuclear fractionation.** HELFs were mock infected or infected with  
525 HCMV at an MOI of 3, harvested at 72 hpi, and fractionated using the Qproteome  
526 Cell Compartment kit (Cat.#37502, Qiagen) as described previously (64). Fractions  
527 were analyzed by IB using GAPDH and Lamin B1 antibodies to confirm separation of  
528 cytosolic and nuclear fractions, respectively.

529

530 **Quantitation of viral genome copy number.** Genomic DNA from each fraction  
531 were analyzed by qPCR to quantitate viral DNAs using HCMV UL83 primers as  
532 described previously (53). Means and standard deviations (SD) from at least three  
533 independent experiments were calculated.

534

535 **Virus particles and capsid purification.** HELs were infected with HCMV at an MOI  
536 of 0.02 and harvested after CPE reached 100%. Culture medium was collected and  
537 clarified by centrifugation at  $2,000 \times g$  for 10 min. Virus particles were pelleted from  
538 the supernatants at  $100,000 \times g$  for 2 h at  $4^\circ\text{C}$  in an SW 32Ti rotor using a Beckman  
539 Optima<sup>TM</sup> L-100 XP Ultracentrifuge. The pellet was resuspended and layered onto an  
540 iodixanol gradient that was prepared by sequentially layering 800  $\mu\text{l}$  volumes of 50%,

541 40%, 30%, 20%, and 10% iodixanol (Cat.#D1556, Sigma) in PBS (v/v) followed by  
542 incubation overnight at 4 °C. Gradients were then centrifuged  $100,000 \times g$  for 2 h at 4  
543 °C by using an SW 55Ti rotor and Optima™ MAX-XP Ultracentrifuge. The virion-  
544 containing band was observed by light-scattering, collected, and stored at -80 °C.

545 For purification of nuclear capsids, infected HELs were harvested at 48 hpi, cell  
546 pellets were washed with  $1 \times$  phosphate-buffered saline (PBS) and incubated in NP-  
547 40 lysis buffer (0.5% NP-40, 5 M NaCl, 1 M Tris-HCl, pH = 7.0) at 4 °C for 20 min.  
548 Nuclei were centrifuged at  $2,000 \times g$  for 10 min, resuspended in TNE (500 mM NaCl,  
549 10 mM Tris-HCl, 1 mM EDTA, pH = 8.0), sonicated (VCX130, SONICS) at 25%  
550 amplitude for 18 s (3s on, 3s off), and centrifuged at  $2,000 \times g$  for 10 min. This step  
551 was repeated once and combined supernatants were centrifuged at  $10,000 \times g$  for 20  
552 min at 4°C to remove cell debris. Supernatants containing capsids were subjected to  
553 iodixanol density gradient centrifugation described above. Capsids were observed as  
554 light-scattering bands, collected, and stored at -80 °C.

555

556 **Transmission electron microscopy (TEM).** HELFs (Ctl) and the WDR knockdown  
557 HELFs (KD) were infected with HCMV at an MOI of 0.5 and harvested at 120 hpi.  
558 Cells were fixed with 2.5% (W/V) glutaraldehyde for 1 h at room temperature then  
559 treated with 1% osmium tetroxide and dehydrated through a graded series of ethanol  
560 concentrations (from 30 to 100%) and embedding with an Embed 812 kit (Electron  
561 Microscopy Sciences, Fort Washington, PA). Ultrathin sections (60 to 80 nm) of  
562 embedded specimens were prepared and deposited onto formvar-coated copper grids  
563 (200-mesh), stained with 2% (W/V) phosphotungstic acid (PTA, pH 6.8), and  
564 observed under a Tecnai transmission electron microscope (FEI) operated at 200 kV  
565 as described previously (47).

566

567 **Immuno-electron microscopy.** Purified virions were mock treated or treated with 2%  
568 Triton X-100, then adsorbed onto carbon-coated nickel 150 mesh grids for 2 h at room  
569 temperature and blocked with 5% goat serum albumin. Grids were incubated with  
570 antibodies to WDR5, gB, pp28, or normal mouse IgG overnight at 4 °C in a  
571 humidified chamber. Grids were washed three times for 1 min with PBS and then  
572 incubated for 30 min at room temperature with 10-nm colloidal gold-affiniPure goat  
573 anti-mouse IgG. Grids were washed once with PBS and once with water, then stained  
574 with 2% (w/v) phosphotungstic acid for 30 s. Grids were observed using a Tecnai G<sup>2</sup>  
575 20 TWIN transmission electron microscope (FEI) operated at 200 kV.

576

577 **LC-MS/MS analysis.** LC-MS/MS analysis was performed on a Q Exactive mass  
578 spectrometer (Thermo Scientific) that is coupled to Easy nLC (Proxeon Biosystems,  
579 now Thermo Fisher Scientific) for 60 min. The mass spectrometer was operated in  
580 positive ion mode. MS data was acquired using a data-dependent top 10 method  
581 dynamically choosing the most abundant precursor ions from the survey scan (300–  
582 1800 m/z) for HCD fragmentation. Automatic gain control (AGC) target was set to  
583 3e6, and maximum inject time to 10 ms. Dynamic exclusion duration was 40.0 s.  
584 Survey scans were acquired at a resolution of 70,000 at m/z 200 and resolution for  
585 HCD spectra was set to 17,500 at m/z 200. Isolation width was 2 m/z. Normalized  
586 collision energy was 30 eV and the underfill ratio, which specifies the minimum  
587 percentage of the target value likely to be reached at maximum fill time, was defined  
588 as 0.1%. The instrument was run with peptide recognition mode enabled.

589

590 **Statistical analyses.** Data were analyzed by chi-square or one-way ANOVA, as  
591 appropriate, using SPSS software (version 18.0; SPSS). Results were shown as means  
592  $\pm$  one standard deviation from three independent experiments. A value of  $P < 0.05$   
593 was considered significant.



594 **References**

- 595 1. **Cobbs CS, Harkins L, Samanta M, Gillespie GY, Bharara S, King PH,**  
596 **Nabors LB, Cobbs CG, Britt WJ.** 2002. Human cytomegalovirus infection  
597 and expression in human malignant glioma. *Cancer Res* **62**:3347-3350.
- 598 2. **Wen L, Qiu Y, Cheng S, Jiang X, Ma YP, Fang W, Wang W, Cui J, Ruan**  
599 **Q, Zhao F, Hu F, Luo MH.** 2018. Serologic and viral genome prevalence of  
600 HSV, EBV, and HCMV among healthy adults in Wuhan, China. *J Med Virol*  
601 **90**:571-581.
- 602 3. **Jean Beltran PM, Cristea IM.** 2014. The life cycle and pathogenesis of  
603 human cytomegalovirus infection: lessons from proteomics. *Expert Rev*  
604 *Proteomics* **11**:697-711.
- 605 4. **Tandon R, Mocarski ES.** 2012. Viral and host control of cytomegalovirus  
606 maturation. *Trends Microbiol* **20**:392-401.
- 607 5. **Eddleston M, Peacock S, Juniper M, Warrell D.** 1997. Severe  
608 cytomegalovirus infection in immunocompetent patients. *Clinical infectious*  
609 *diseases* **24**:52-56.
- 610 6. **Ho M.** 1990. Epidemiology of cytomegalovirus infections. Review of  
611 *Infectious Diseases* **12**:S701-S710.
- 612 7. **Söderberg-Nauclér C, Fish KN, Nelson JA.** 1997. Reactivation of latent  
613 human cytomegalovirus by allogeneic stimulation of blood cells from healthy  
614 donors. *Cell* **91**:119-126.
- 615 8. **Arizaheredia EJ, Nesher L, Chemaly RF.** 2014. Cytomegalovirus diseases  
616 after hematopoietic stem cell transplantation: A mini-review. *Cancer Lett*  
617 **342**:1-8.
- 618 9. **Dominietto A, Raiola AM, Van Lint MT, Lamparelli T, Gualandi F,**  
619 **Berisso G, Bregante S, Frassoni F, Casarino L, Verdiani S.** 2001.  
620 Factors influencing haematological recovery after allogeneic haemopoietic  
621 stem cell transplants : graft-versus-host disease, donor type, cytomegalovirus  
622 infections and cell dose. *Br J Haematol* **112**:219-227.
- 623 10. **Focosi D, Sordi E, Papineschi F, Benedetti E, Galimberti S, Petrini M.**  
624 2009. Fatal ongoing human cytomegalovirus reactivation during high-dose  
625 melphalan and autologous stem cell transplantation†. *J Med Virol* **81**:857-860.
- 626 11. **Streblow DN, Orloff SL, Nelson JA.** 2007. Acceleration of allograft failure  
627 by cytomegalovirus. *Curr Opin Immunol* **19**:577-582.
- 628 12. **Han XY.** 2007. Epidemiologic analysis of reactivated cytomegalovirus  
629 antigenemia in patients with cancer. *J Clin Microbiol* **45**:1126-1132.
- 630 13. **Boppana S, Britt WJ, Pass RF.** 1997. Progressive and fluctuating  
631 sensorineural hearing loss in children with asymptomatic congenital  
632 cytomegalovirus infection. *Journal of Pediatrics* **130**.
- 633 14. **Williamson WD, Demmler GJ, Percy AK, Catlin FI.** 1992. Progressive  
634 hearing loss in infants with asymptomatic congenital cytomegalovirus  
635 infection. *Pediatrics* **90**:862-866.
- 636 15. **Swanson EC, Schleiss MR.** 2013. Congenital cytomegalovirus infection:  
637 new prospects for prevention and therapy. *Pediatr Clin North Am* **60**:335-349.
- 638 16. **Kawai K, Itoh H.** 2018. Congenital Cytomegalovirus Infection. *N Engl J Med*  
639 **379**:e21.
- 640 17. **Alwine J.** 2012. The Human Cytomegalovirus Assembly Compartment: A  
641 Masterpiece of Viral Manipulation of Cellular Processes That Facilitates  
642 Assembly and Egress. *PLoS Pathog* **8**:e1002878.

- 643 18. **Sanchez V, Greis KD, Sztul E, Britt WJ.** 2000. Accumulation of virion  
644 tegument and envelope proteins in a stable cytoplasmic compartment during  
645 human cytomegalovirus replication: characterization of a potential site of  
646 virus assembly. *Journal of virology* **74**:975-986.
- 647 19. **Das S, Vasanji A, Pellett PE.** 2007. Three-dimensional structure of the  
648 human cytomegalovirus cytoplasmic virion assembly complex includes a  
649 reoriented secretory apparatus. *J Virol* **81**:11861-11869.
- 650 20. **Seo JY, Britt WJ.** 2007. Cytoplasmic envelopment of human  
651 cytomegalovirus requires the postlocalization function of tegument protein  
652 pp28 within the assembly compartment. *J Virol* **81**:6536-6547.
- 653 21. **Das S, Ortiz DA, Gurczynski SJ, Khan F, Pellett PE.** 2014. Identification  
654 of human cytomegalovirus genes important for biogenesis of the cytoplasmic  
655 virion assembly complex. *J Virol* **88**:9086-9099.
- 656 22. **Goulidaki N, Alarifi S, Alkahtani SH, Al-Qahtani A, Spandidos DA,  
657 Stournaras C, Sourvinos G.** 2015. RhoB is a component of the human  
658 cytomegalovirus assembly complex and is required for efficient viral  
659 production. *Cell Cycle* **14**:2748-2763.
- 660 23. **Xie M, Xuan B, Shan J, Pan D, Sun Y, Shan Z, Zhang J, Yu D, Li B,  
661 Qian Z.** 2015. Human cytomegalovirus exploits interferon-induced  
662 transmembrane proteins to facilitate morphogenesis of the virion assembly  
663 compartment. *J Virol* **89**:3049-3061.
- 664 24. **Bughio F, Umashankar M, Wilson J, Goodrum F.** 2015. Human  
665 Cytomegalovirus UL135 and UL136 Genes Are Required for Postentry Tropism  
666 in Endothelial Cells. *J Virol* **89**:6536-6550.
- 667 25. **Hook LM, Grey F, Grabski R, Tirabassi R, Doyle T, Hancock M,  
668 Landais I, Jeng S, McWeeny S, Britt W, Nelson JA.** 2014.  
669 Cytomegalovirus miRNAs target secretory pathway genes to facilitate  
670 formation of the virion assembly compartment and reduce cytokine secretion.  
671 *Cell Host Microbe* **15**:363-373.
- 672 26. **Cruz L, Streck NT, Ferguson K, Desai T, Desai D, Amin S, Buchkovich  
673 NJ.** 2017. Potent Inhibition of Human Cytomegalovirus by Modulation of  
674 Cellular SNARE Syntaxin 5. *Journal of Virology* **91**.
- 675 27. **Buchkovich NJ, Maguire TG, Alwine JC.** 2010. Role of the endoplasmic  
676 reticulum chaperone BiP, SUN domain proteins, and dynein in altering nuclear  
677 morphology during human cytomegalovirus infection. *J Virol* **84**:7005-7017.
- 678 28. **Buchkovich NJ, Maguire TG, Paton AW, Paton JC, Alwine JC.** 2009.  
679 The endoplasmic reticulum chaperone BiP/GRP78 is important in the structure  
680 and function of the human cytomegalovirus assembly compartment. *J Virol*  
681 **83**:11421-11428.
- 682 29. **Indran SV, Ballestas ME, Britt WJ.** 2010. Bicaudal D1-dependent  
683 trafficking of human cytomegalovirus tegument protein pp150 in virus-  
684 infected cells. *J Virol* **84**:3162-3177.
- 685 30. **Krzyzaniak MA, Mach M, Britt WJ.** 2009. HCMV-encoded glycoprotein M  
686 (UL100) interacts with Rab11 effector protein FIP4. *Traffic* **10**:1439-1457.
- 687 31. **Varnum SM, Streblow DN, Monroe ME, Smith P, Auberry KJ, Pasa-  
688 Tolic L, Wang D, Camp DG, 2nd, Rodland K, Wiley S, Britt W, Shenk T,  
689 Smith RD, Nelson JA.** 2004. Identification of proteins in human  
690 cytomegalovirus (HCMV) particles: the HCMV proteome. *J Virol* **78**:10960-  
691 10966.
- 692 32. **Abraham E, Pantoja M, Kucherenko MM, Yatsenko AS, Shcherbata  
693 HR, Fischer KA, Maksymiv DV, Chernyk YI, Ruohola-Baker H.** 2008.

- 694 Genetic Modifier Screens Reveal New Components that Interact with the  
695 *Drosophila* Dystroglycan-Dystrophin Complex. *PLoS ONE* **3**:e2418.
- 696 33. **Dias J, Van Nguyen N, Georgiev P, Gaub A, Brettschneider J, Cusack**  
697 **S, Kadlec J, Akhtar A.** 2014. Structural analysis of the  
698 KANSL1/WDR5/KANSL2 complex reveals that WDR5 is required for efficient  
699 assembly and chromatin targeting of the NSL complex. *Genes Dev* **28**:929-  
700 942.
- 701 34. **Cho YW, Hong T, Hong S, Guo H, Yu H, Kim D, Guszczynski T,**  
702 **Dressler GR, Copeland TD, Kalkum M, Ge K.** 2007. PTIP associates with  
703 MLL3- and MLL4-containing histone H3 lysine 4 methyltransferase complex. *J*  
704 *Biol Chem* **282**:20395-20406.
- 705 35. **Song JJ, Kingston RE.** 2008. WDR5 interacts with mixed lineage leukemia  
706 (MLL) protein via the histone H3-binding pocket. *J Biol Chem* **283**:35258-  
707 35264.
- 708 36. **Mo R, Rao SM, Zhu YJ.** 2006. Identification of the MLL2 complex as a  
709 coactivator for estrogen receptor alpha. *J Biol Chem* **281**:15714-15720.
- 710 37. **Dharmarajan V, Lee JH, Patel A, Skalnik DG, Cosgrove MS.** 2012.  
711 Structural basis for WDR5 interaction (Win) motif recognition in human SET1  
712 family histone methyltransferases. *J Biol Chem* **287**:27275-27289.
- 713 38. **Chen X, Xie W, Gu P, Cai Q, Wang B, Xie Y, Dong W, He W, Zhong G,**  
714 **Lin T, Huang J.** 2015. Upregulated WDR5 promotes proliferation, self-  
715 renewal and chemoresistance in bladder cancer via mediating H3K4  
716 trimethylation. *Sci Rep* **5**:8293.
- 717 39. **Wu MZ, Tsai YP, Yang MH, Huang CH, Chang SY, Chang CC, Teng SC,**  
718 **Wu KJ.** 2011. Interplay between HDAC3 and WDR5 is essential for hypoxia-  
719 induced epithelial-mesenchymal transition. *Mol Cell* **43**:811-822.
- 720 40. **Wysocka J, Swigut T, Milne TA, Dou Y, Zhang X, Burlingame AL,**  
721 **Roeder RG, Brivanlou AH, Allis CD.** 2005. WDR5 associates with histone  
722 H3 methylated at K4 and is essential for H3 K4 methylation and vertebrate  
723 development. *Cell* **121**:859-872.
- 724 41. **Zhu ED, Demay MB, Gori F.** 2008. Wdr5 is essential for osteoblast  
725 differentiation. *J Biol Chem* **283**:7361-7367.
- 726 42. **Kulkarni SS, Griffin JN, Date PP, Liem KF, Jr., Khokha MK.** 2018.  
727 WDR5 Stabilizes Actin Architecture to Promote Multiciliated Cell Formation.  
728 *Dev Cell* **46**:595-610 e593.
- 729 43. **Ang YS, Tsai SY, Lee DF, Monk J, Su J, Ratnakumar K, Ding J, Ge Y,**  
730 **Darr H, Chang B, Wang J, Rendl M, Bernstein E, Schaniel C,**  
731 **Lemischka IR.** 2011. Wdr5 mediates self-renewal and reprogramming via  
732 the embryonic stem cell core transcriptional network. *Cell* **145**:183-197.
- 733 44. **Yang YW, Flynn RA, Chen Y, Qu K, Wan B, Wang KC, Lei M, Chang HY.**  
734 2014. Essential role of lncRNA binding for WDR5 maintenance of active  
735 chromatin and embryonic stem cell pluripotency. *Elife* **3**:e02046.
- 736 45. **Wang YY, Liu LJ, Zhong B, Liu TT, Li Y, Yang Y, Ran Y, Li S, Tien P,**  
737 **Shu HB.** 2010. WDR5 is essential for assembly of the VISA-associated  
738 signaling complex and virus-triggered IRF3 and NF-kappaB activation. *PNAS*  
739 **107**:815-820.
- 740 46. **Ma D, George CX, Nomburg JL, Pfaller CK, Cattaneo R, Samuel CE.**  
741 2018. Upon Infection, Cellular WD Repeat-Containing Protein 5 (WDR5)  
742 Localizes to Cytoplasmic Inclusion Bodies and Enhances Measles Virus  
743 Replication. *J Virol* **92**:e01726-01717.
- 744 47. **Yang B, Liu XJ, Yao Y, Jiang X, Wang XZ, Yang H, Sun JY, Miao Y,**  
745 **Wang W, Huang ZL, Wang Y, Tang Q, Rayner S, Britt WJ, McVoy MA,**

- 746 **Luo MH, Zhao F.** 2018. WDR5 Facilitates Human Cytomegalovirus  
747 Replication by Promoting Capsid Nuclear Egress. *J Virol* **92**:e00207-00218.
- 748 48. **Oakley BR, Oakley CE, Yoon Y, Jung MK.** 1990.  $\gamma$ -Tubulin is a component  
749 of the spindle pole body that is essential for microtubule function in  
750 *Aspergillus nidulans*. *Cell* **61**:1289-1301.
- 751 49. **Vasquez R, Howell B, Yvon A, Wadsworth P, Cassimeris L.** 1997.  
752 Nanomolar concentrations of nocodazole alter microtubule dynamic instability  
753 in vivo and in vitro. *Molecular Biology of the Cell* **8**.
- 754 50. **Li W, Avey D, Fu B, Wu JJ, Ma S, Liu X, Zhu F.** 2016. Kaposi's Sarcoma-  
755 Associated Herpesvirus Inhibitor of cGAS (KicGAS), Encoded by ORF52, Is an  
756 Abundant Tegument Protein and Is Required for Production of Infectious  
757 Progeny Viruses. *J Virol* **90**:5329-5342.
- 758 51. **Shaw ML, Stone KL, Colangelo CM, Gulcicek EE, Palese P.** 2008.  
759 Cellular proteins in influenza virus particles. *PLoS Pathog* **4**:e1000085.
- 760 52. **Dell'Oste V, Gatti D, Gugliesi F, De Andrea M, Bawadekar M, Lo  
761 Cigno I, Biolatti M, Vallino M, Marschall M, Gariglio M, Landolfo S.**  
762 2014. Innate nuclear sensor IFI16 translocates into the cytoplasm during the  
763 early stage of in vitro human cytomegalovirus infection and is entrapped in  
764 the egressing virions during the late stage. *J Virol* **88**:6970-6982.
- 765 53. **Fu YR, Liu XJ, Li XJ, Shen ZZ, Yang B, Wu CC, Li JF, Miao LF, Ye HQ,  
766 Qiao GH, Rayner S, Chavanas S, Davrinche C, Britt WJ, Tang Q,  
767 McVoy M, Mocarski E, Luo MH.** 2015. MicroRNA miR-21 attenuates human  
768 cytomegalovirus replication in neural cells by targeting Cdc25a. *J Virol*  
769 **89**:1070-1082.
- 770 54. **Zeng WB, Jiang HF, Gang YD, Song YG, Shen ZZ, Yang H, Dong X,  
771 Tian YL, Ni RJ, Liu Y, Tang N, Li X, Jiang X, Gao D, Androulakis M, He  
772 XB, Xia HM, Ming YZ, Lu Y, Zhou JN, Zhang C, Xia XS, Shu Y, Zeng SQ,  
773 Xu F, Zhao F, Luo MH.** 2017. Anterograde monosynaptic transneuronal  
774 tracers derived from herpes simplex virus 1 strain H129. *Mol Neurodegener*  
775 **12**:38.
- 776 55. **Jiang HF, Wang W, Jiang X, Zeng WB, Shen ZZ, Song YG, Yang H, Liu  
777 XJ, Dong X, Zhou J, Sun JY, Yu FL, Guo L, Cheng T, Rayner S, Zhao F,  
778 Zhu H, Luo MH.** 2017. ORF7 of Varicella-Zoster Virus Is Required for Viral  
779 Cytoplasmic Envelopment in Differentiated Neuronal Cells. *J Virol* **91**.
- 780 56. **Marchini A, Liu H, Zhu H.** 2001. Human cytomegalovirus with IE-2 (UL122)  
781 deleted fails to express early lytic genes. *J Virol* **75**:1870-1878.
- 782 57. **Hakki M, Geballe AP.** 2005. Double-stranded RNA binding by human  
783 cytomegalovirus pTRS1. *J Virol* **79**:7311-7318.
- 784 58. **Fu Y-R, Liu X-J, Li X-J, Shen Z-z, Yang B, Wu C-C, Li J-F, Miao L-F, Ye  
785 H-Q, Qiao G-H.** 2015. MicroRNA miR-21 attenuates human cytomegalovirus  
786 replication in neural cells by targeting Cdc25a. *Journal of virology* **89**:1070-  
787 1082.
- 788 59. **Plachter B, Britt W, Vornhagen R, Stamminger T, Jahn G.** 1993.  
789 Analysis of proteins encoded by IE regions 1 and 2 of human cytomegalovirus  
790 using monoclonal antibodies generated against recombinant antigens.  
791 *Virology* **193**:642-652.
- 792 60. **Bechtel JT, Shenk T.** 2002. Human Cytomegalovirus UL47 Tegument  
793 Protein Functions after Entry and before Immediate-Early Gene Expression.  
794 *Journal of Virology* **76**:1043-1050.
- 795 61. **Romanowski MJ, Garrido-Guerrero E, Shenk T.** 1997. pIRS1 and pTRS1  
796 are present in human cytomegalovirus virions. *J Virol* **71**:5703-5705.

- 797 62. **Lai L, Britt WJ.** 2003. The Interaction between the Major Capsid Protein and  
798 the Smallest Capsid Protein of Human Cytomegalovirus Is Dependent on Two  
799 Linear Sequences in the Smallest Capsid Protein. *Journal of Virology*  
800 **77**:2730-2735.
- 801 63. **Tang Q, Maul GG.** 2003. Mouse cytomegalovirus immediate-early protein 1  
802 binds with host cell repressors to relieve suppressive effects on viral  
803 transcription and replication during lytic infection. *J Virol* **77**:1357-1367.
- 804 64. **Li XJ, Liu XJ, Yang B, Fu YR, Zhao F, Shen ZZ, Miao LF, Rayner S,**  
805 **Chavanas S, Zhu H, Britt WJ, Tang Q, McVoy MA, Luo MH.** 2015.  
806 Human Cytomegalovirus Infection Dysregulates the Localization and Stability  
807 of NICD1 and Jag1 in Neural Progenitor Cells. *J Virol* **89**:6792-6804.

808

809

810 **FIGURE LEGENDS**

811 **Fig 1. Perinuclear relocalization of WDR5 is specifically induced by HCMV and**

812 **MCMV infection.** HELFs (A and C) or NIH3T3 (B) were infected with the indicated

813 viruses at an MOI of 1. At 48 hpi, cells were fixed and stained with antibodies against

814 WDR5(red) and with either HCMV IE1 protein (A) (green) or MCMV mIE1 (green)

815 (B). Infected cells (C) were detected using corresponding GFP-expressing

816 recombinant viruses. All antibodies used in IFA were mouse monoclonal antibodies.

817 Nuclei were counterstained with DAPI (white). M, mock-infected cells; scale bar = 10

818  $\mu\text{m}$ .

819

820 **Fig 2. HCMV infection induces re-localization and oligomerization of WDR5.** (A)

821 HELFs were mock- (M) or HCMV-infected (V) at an MOI of 3 then processed for

822 immunofluorescence with antibodies against IE1 (green), WDR5 (red), or nuclei

823 (DAPI, white) at the indicated times post infection. Images shown were representative

824 of three independent experiments. All antibodies used in IFA were mouse monoclonal

825 antibodies. Scale bar = 10  $\mu\text{m}$ . (B) Over 100 cells in five representative fields from

826 each independent experiment described in (A) were counted to determine the

827 percentages of infected cells exhibiting diffuse nuclear localization of WDR5 (normal)

828 versus accumulation of WDR5 in perinuclear foci. Data were analyzed using the chi-

829 squared test. N, number counted cells; NS, not significant; \*\*\*,  $P < 0.001$ . (C) HELFs

830 were mock- (M) or HCMV-infected (V) at an MOI of 3. At 96 hpi cytosolic and

831 nuclear fractions were prepared and analyzed by IB for WDR5, pp28, IE1, GAPDH,

832 or Lamin B1. (D) HELFs were mock- or HCMV-infected at an MOI = 1. At 48 hpi,

833 infected cells were treated with DMSO or nuclear export inhibitor Leptomycin B

834 (LMB, 5 $\mu\text{M}$ ) for 12 h, and were co-stained for WDR5 (red), viral protein pp65 (green)



835 and nuclei were counterstained with DAPI (white). All antibodies used in IFA were  
836 mouse monoclonal antibodies. Scale bar = 10  $\mu$ m.

837

838 **Fig 3. WDR5 perinuclear accumulation requires viral replication.** HELFs were  
839 mock- (M), UV-inactivated HCMV (UV), or live HCMV-infected (V) at an MOI of 3  
840 in the presence of DMSO, GCV (100  $\mu$ g/ml), or PAA (100  $\mu$ g/ml). At 72 hpi, samples  
841 were collected and analyzed. (A) The upper panel shows protein levels of WDR5 and  
842 viral proteins determined by IB with actin as a loading control. The lower panel shows  
843 the relative levels of WDR5 protein in infected vs. mock-infected cultures normalized  
844 with GAPDH. Data from three independent experiments were analyzed by one-way  
845 ANOVA, and the results are presented as averages  $\pm$  SD. \*,  $P < 0.05$ ; \*\*,  $P < 0.01$ ,  
846 NS, no significance. (B) Relative mRNA levels of WDR5. Samples were harvested at  
847 the indicated times, and total RNA was isolated. Relative mRNA levels of WDR5  
848 were determined by qRT-PCR; GAPDH is an internal control. Data were normalized  
849 to levels in mock-infected cells to provide fold-changes post HCMV infection. (C)  
850 Accumulation of WDR5 in perinuclear region. WDR5 perinuclear foci are indicated  
851 by white arrows; scale bar = 10  $\mu$ m.

852

853 **Fig 4. WDR5 localizes to vAC and MTOC.** (A) HELFs were infected with HCMV  
854 at an MOI of 3 and at 72 hpi co-stained for WDR5 and markers of cytoskeleton ( $\alpha$ -  
855 tubulin), centrosome ( $\gamma$ -tubulin), Golgi (58K), or early endosome (EEA1). (B) HELFs  
856 were infected for 72 h and then treated with 2  $\mu$ M NOC for the times indicated prior  
857 to staining for WDR5. (C) HCMV-infected HELFs were stained at 96 hpi for WDR5  
858 (red) and co-stained for viral proteins pp28, pp65, or gB (green). Panel below shows a  
859 3D-reconstruction of WDR5 colocalization with gB from the cell shown in the panel

860 above. Scale bar = 10  $\mu$ m. (D) WDR5 associated with HCMV capsid protein in vAC.  
861 HFFs were infected with HCMV at an MOI of 3 and stained for WDR5 (green), SCP  
862 (red), and DNA (blue) at 96 hpi and analyzed with Nikon A1R HD25 confocal system.  
863 Top panels show deconvolved single channel maximum intensity z axis projections of  
864 a representative cell. Panels below show 3-D reconstructions of deconvolved confocal  
865 Z-series images of the vAC. All antibodies used in IFA were mouse monoclonal  
866 antibodies, nuclei were counterstained with DAPI. and scale bar = 10  $\mu$ m.

867

868 **Fig 5. Knockdown WDR5 altered vAC formation and virion morphogenesis**

869 (A) HELFs were transduced with shRNA to WDR5 (KD) or a scrambled control  
870 shRNA (Ctl) as described previously (47). Cells were infected with HCMV at an MOI  
871 of 0.5, harvested at 96 hpi, stained for gB with mouse monoclonal antibody, nuclei  
872 were counterstained with DAPI, scale bar = 10  $\mu$ m (Left upper panels). Based on  
873 morphology, vACs were classified as regular or irregular, and representative images  
874 are shown (a, b, c, and d, Left lower panels). Regular and irregular vACs were  
875 quantitated (Right panel). n, number of quantitated infected cells; data were analyzed  
876 by chi-squared test. \*\*\*,  $P < 0.001$ .(B) Ctl (a to e) and KD (f to k) cells were infected  
877 with HCMV at an MOI of 0.5. At 120hpi, cells were fixed, embedded, sectioned and  
878 negative-stained for TEM analysis. Representative images are shown to illustrate the  
879 enveloped virions (arrowheads), and nonenveloped capsids (arrows) in the cytoplasm.  
880 (C) Quantitation and classification of viral particles. About three hundred total  
881 cytoplasmic viral particles were counted. The percentages of normal virions and  
882 nonenveloped capsids in each infection are illustrated. Data were analyzed by chi-  
883 squared test. n, number of cytoplasmic viral particles counted cells; \*\*\*,  $P < 0.001$ .

884



885

886 **Fig 6. Subcellular localization of different WDR5 deletion mutants**

887 (A) Schematic representation of N-terminal Flag-tagged full-length WDR5 and  
888 deletion mutants. Flag, Flag tag; L, linker-GAAAAS; NT, N-terminal; WD, WD40-  
889 repeat motif. (B) Expression vectors encoding full-length WDR5 or deletion mutants  
890 were transfected in HELF cells. At 24 hours post transfection, cells were mock-  
891 infected (M) or infected with HCMV (V) at an MOI of 3. At 72 hpi, samples were  
892 collected and analyzed by IFA for pp28 (green), Flag (red), or nuclei (DAPI, white).  
893 All antibodies used in IFA were mouse monoclonal antibodies. Scale bar = 10  $\mu$ m.

894

895 **Fig 7. WDR5 co-purifies with HCMV particles by gradient fractionation.** (A)

896 Flow chart illustrating the analysis of particles from mock- or HCMV-infected  
897 cultures by iodixanol density gradient centrifugation (see Materials and Methods for  
898 details). (B) Gradient fractions derived from mock-infected (M) or infected (V)  
899 cultures were analyzed by immune-dot-blot for WDR5, gB, or pUL48. (C) Viral-  
900 genome copies in each fraction were determined by qPCR and plotted together with  
901 protein levels quantitated using ImageJ software from the dot-blots shown in (B).

902

903 **Fig 8. WDR5 is present in HCMV virions.** (A) Purified HCMV virions were mock

904 treated or treated with 2% Triton X-100 for 1 hour at room temperature then analyzed  
905 by iodixanol density gradient centrifugation. Fractions collected from gradients of  
906 virions that were mock treated (top) or Triton X-100-treated (bottom), as well as  
907 unfractionated lysates from mock- (M) or HCMV-infected (V) HELFs, were analyzed  
908 by IB using the indicated antibodies. (B) Mock- or Triton X-100-treated virions were  
909 analyzed by immuno-gold electron microscopy using mAbs to gB (a), pp28 (b),

910 WDR5 (c), or normal mouse IgG (d). Samples were negatively stained with  
911 phosphotungstic acid and visualized by electron microscopy (25,000 × magnification).  
912 (C) HCMV virions were purified as previously described. Nuclei from infected-HELs  
913 were prepared at 60 hpi and intranuclear capsids were purified as in described in  
914 Materials and Methods. Purified virions and capsids were visualized by electron  
915 microscopy. The components (viral proteins and WDR5) were analyzed by IB.

916

917 **Fig 9. WDR5 interacts with MCP, pp150, pp65, pIRS1, and pTRS1.** (A) HELF  
918 overexpressing with Flag-tagged WDR5 were mock- (M) or HCMV-infected (V) at  
919 an MOI of 3. At 96 hpi lysates were immunoprecipitated by anti-Flag antibody,  
920 separated by SDS-PAGE, and stained with Coomassie Brilliant Blue. Four protein  
921 species specific to infected cells (red arrows, lane 4) were cut from the gel and  
922 combined and analyzed by LC-MS/MS. (B) Spectral counts of identified viral  
923 proteins by mass spectrometric analyses are shown. (C-H) HEK293T cells were co-  
924 transfected with a plasmid expressing HA-tagged WDR5 (HA-WDR5) along with  
925 plasmids expressing His-tagged pp28 (pp28-6×His) (C), Myc-tagged MCP (6×Myc-  
926 MCP) (D), Flag-tagged pp65 (Flag-pp65) (E), Myc-tagged pp150 (6×Myc-pp150) (F),  
927 Flag-tagged pIRS1 (Flag-IRS1) (G), or V5-tagged pTRS1 (pTRS1-V5) (H). After 48  
928 h lysates were immunoprecipitated and then immunoblotted using the indicated  
929 antibodies.

930

931 **Fig 10. Working model.** In the nucleus WDR5 facilitates capsid nuclear egress by  
932 promoting assembly of the NEC (Yang B, *et al.* J Virol 2018). WDR5 may egress  
933 from the nuclei with the capsids and then be transported to the vAC together with

934 capsids and/or tegument proteins (*eg.* pp150 and pp65, *etc.*). In the vAC, WDR5 is  
935 incorporated into maturing virions.

FIG1

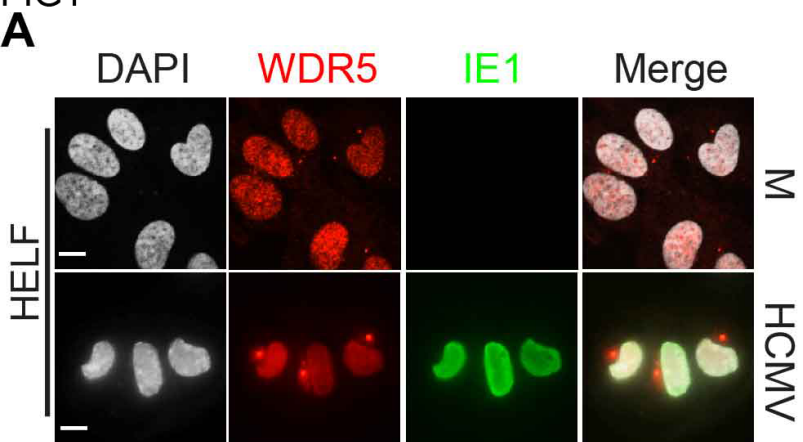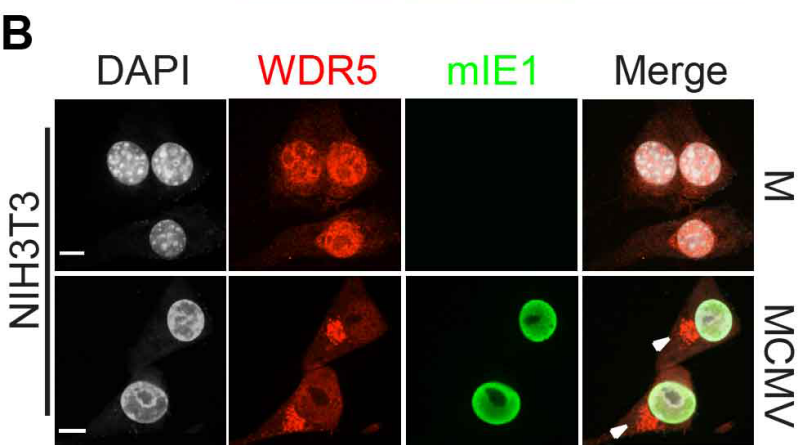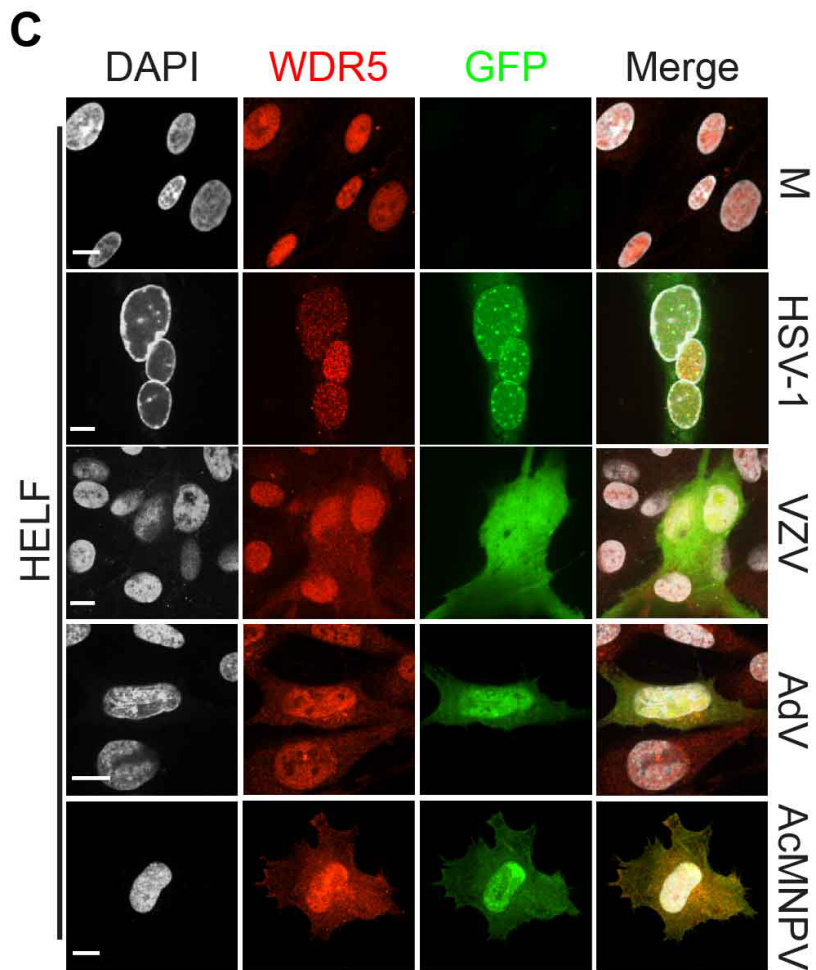

FIG2

**A**

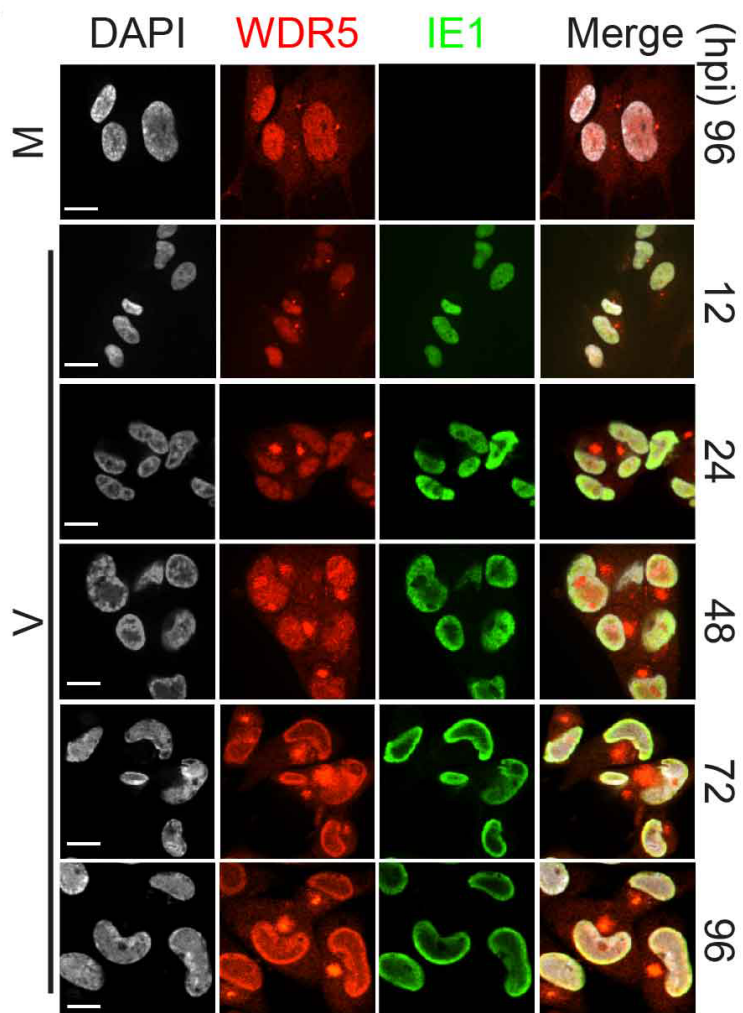

**B**

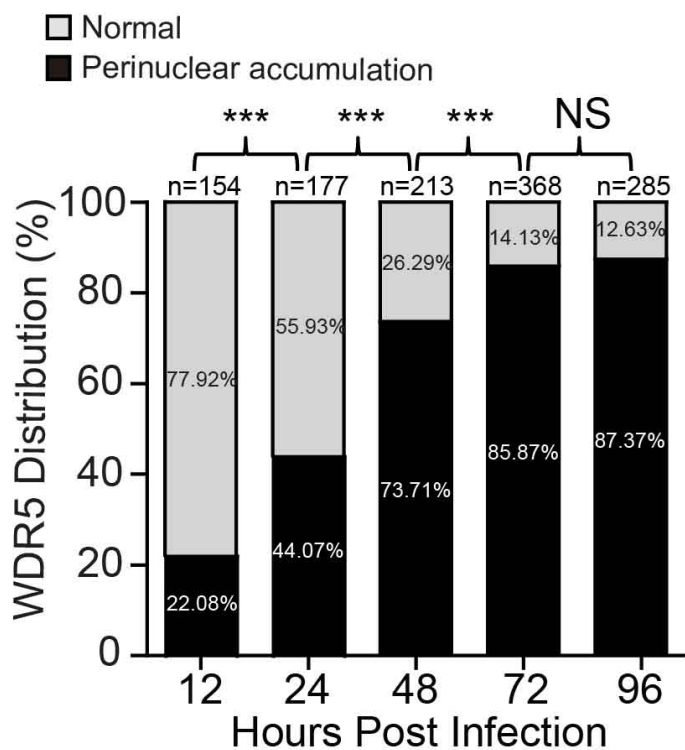

**C**

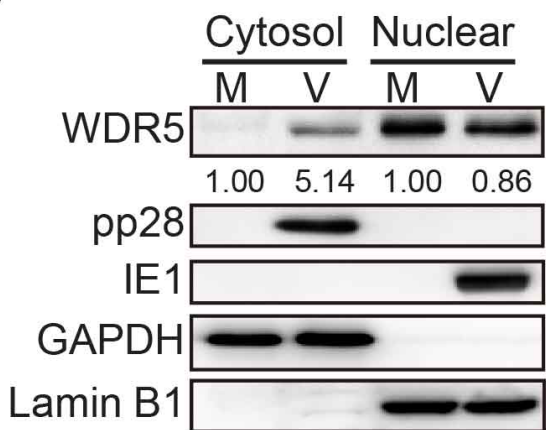

**D**

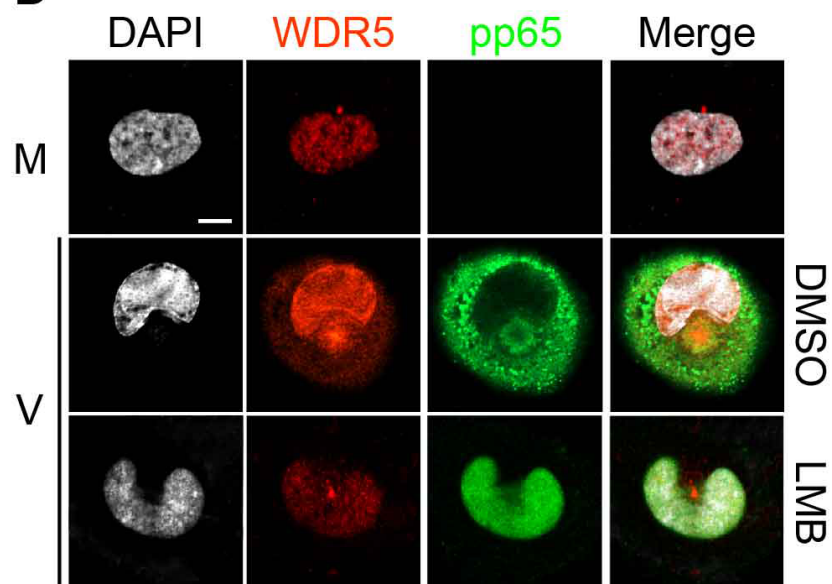

FIG3

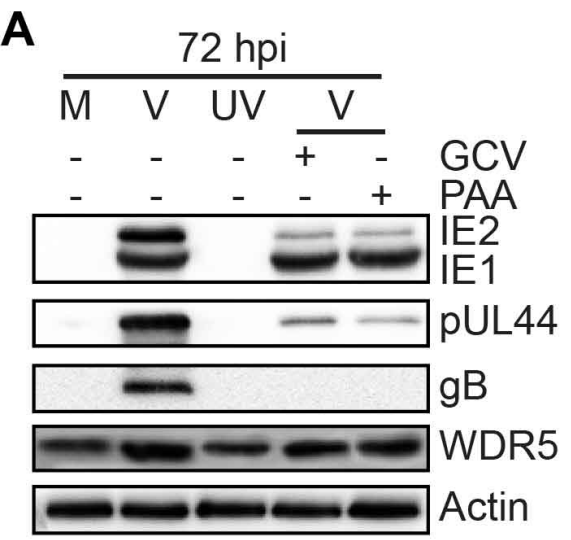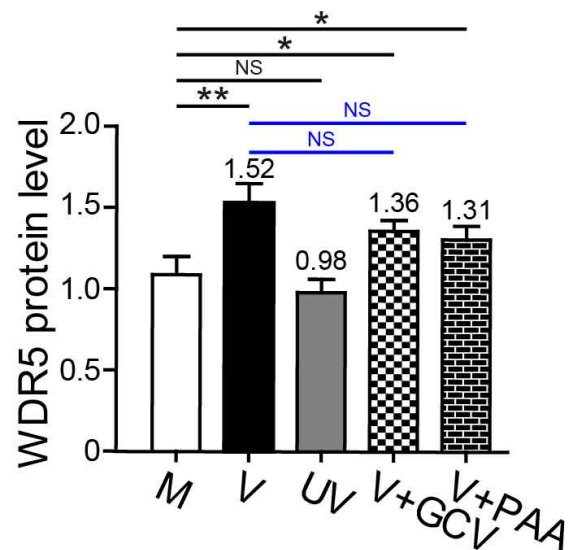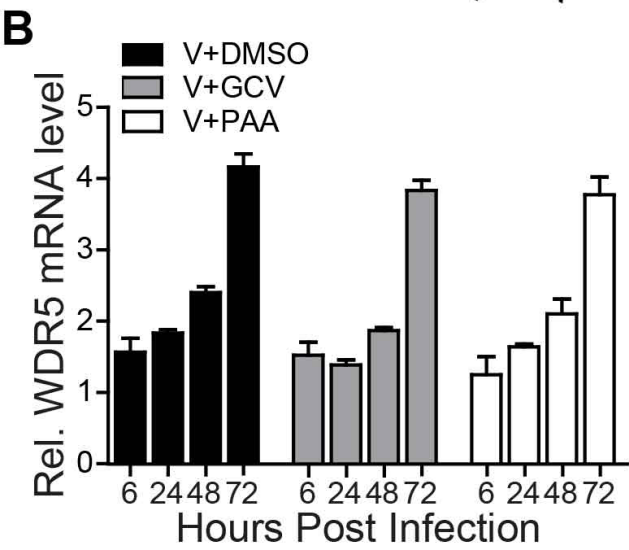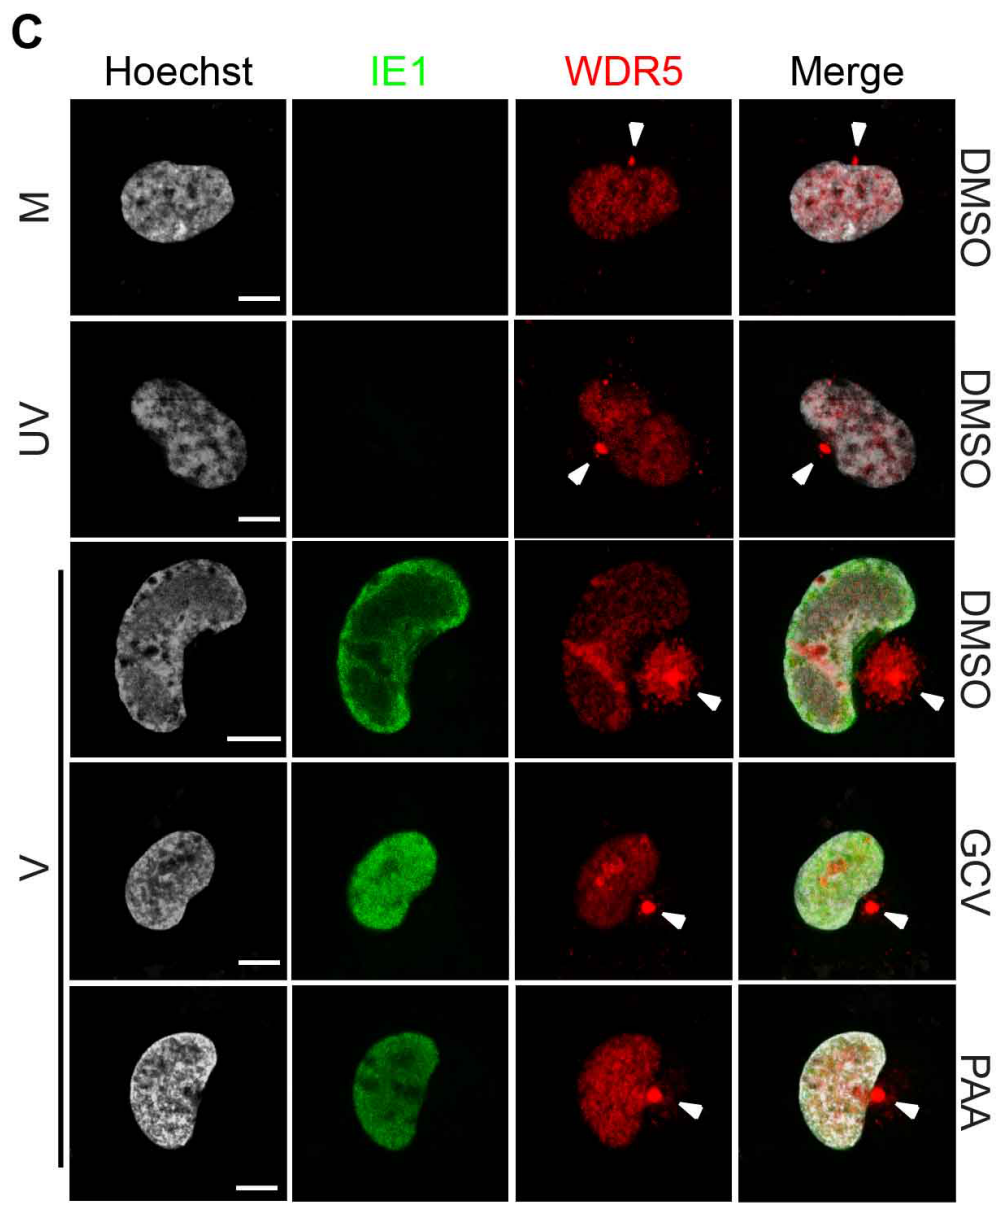



FIG4

**A** V (72 hpi)

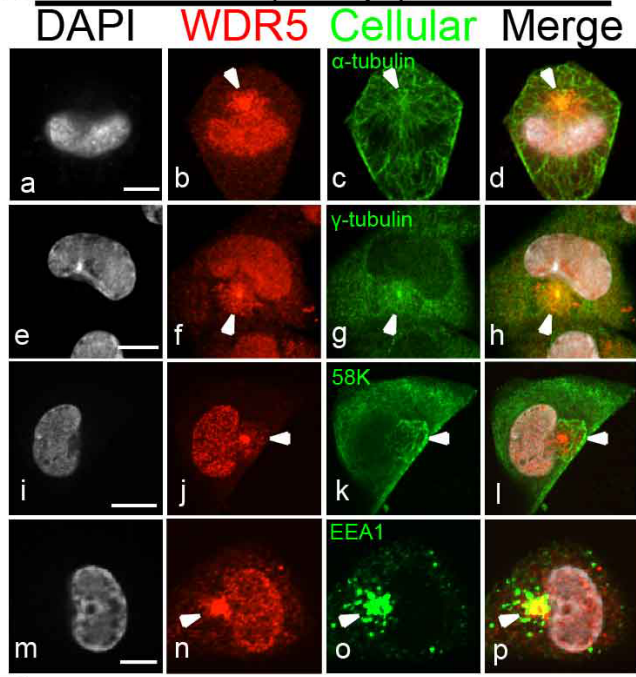

**B** V + NOC

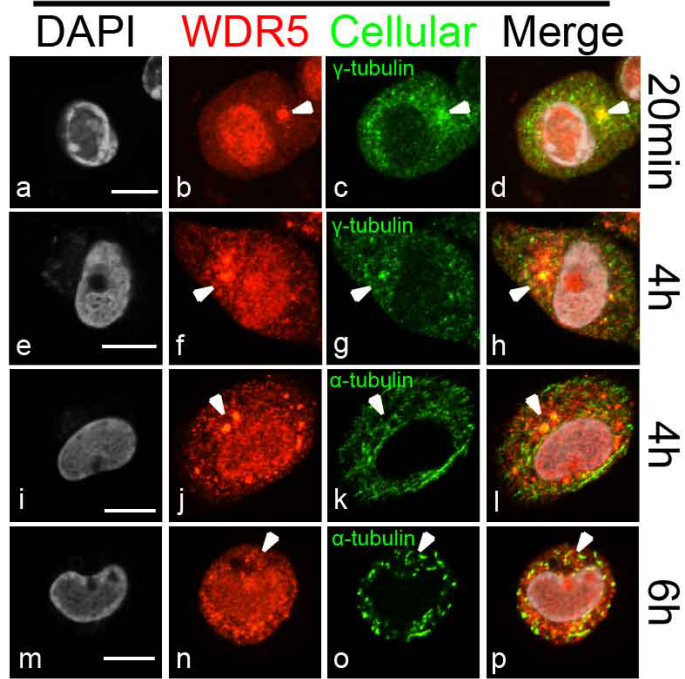

**C** V (96 hpi)

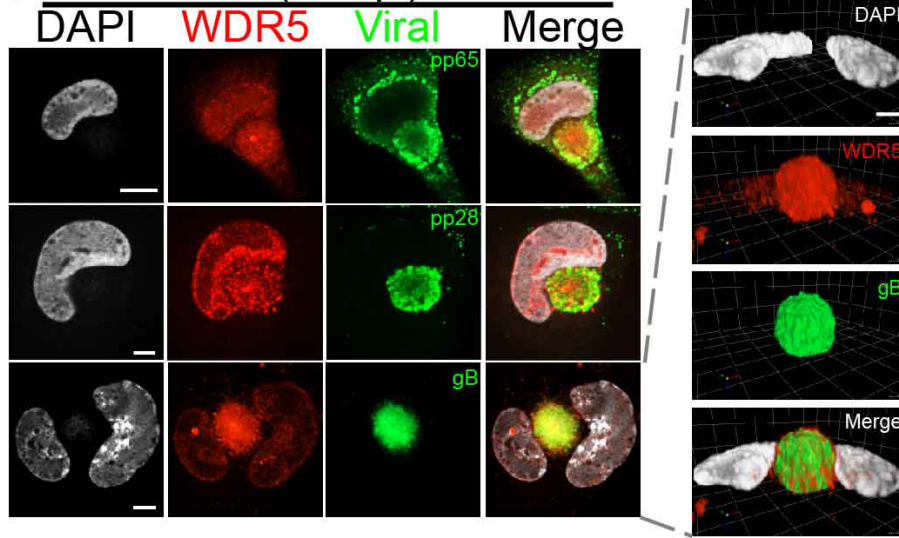

FIG5

**A**

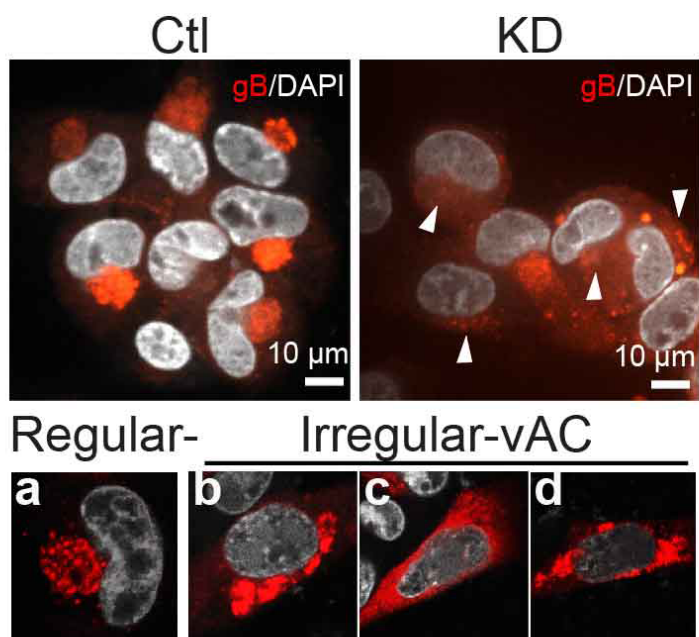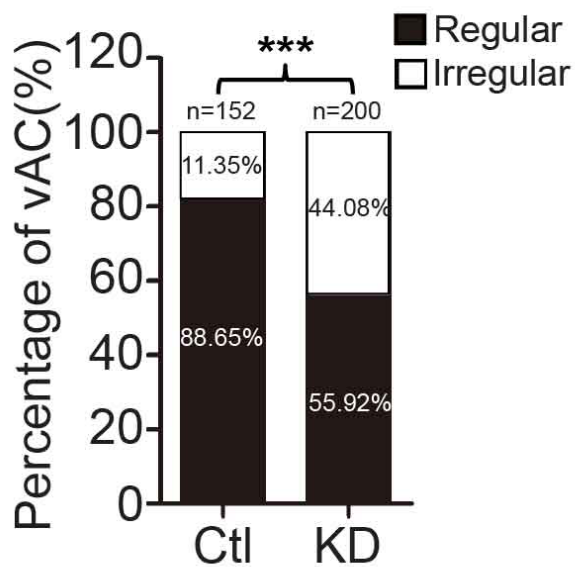

**B**

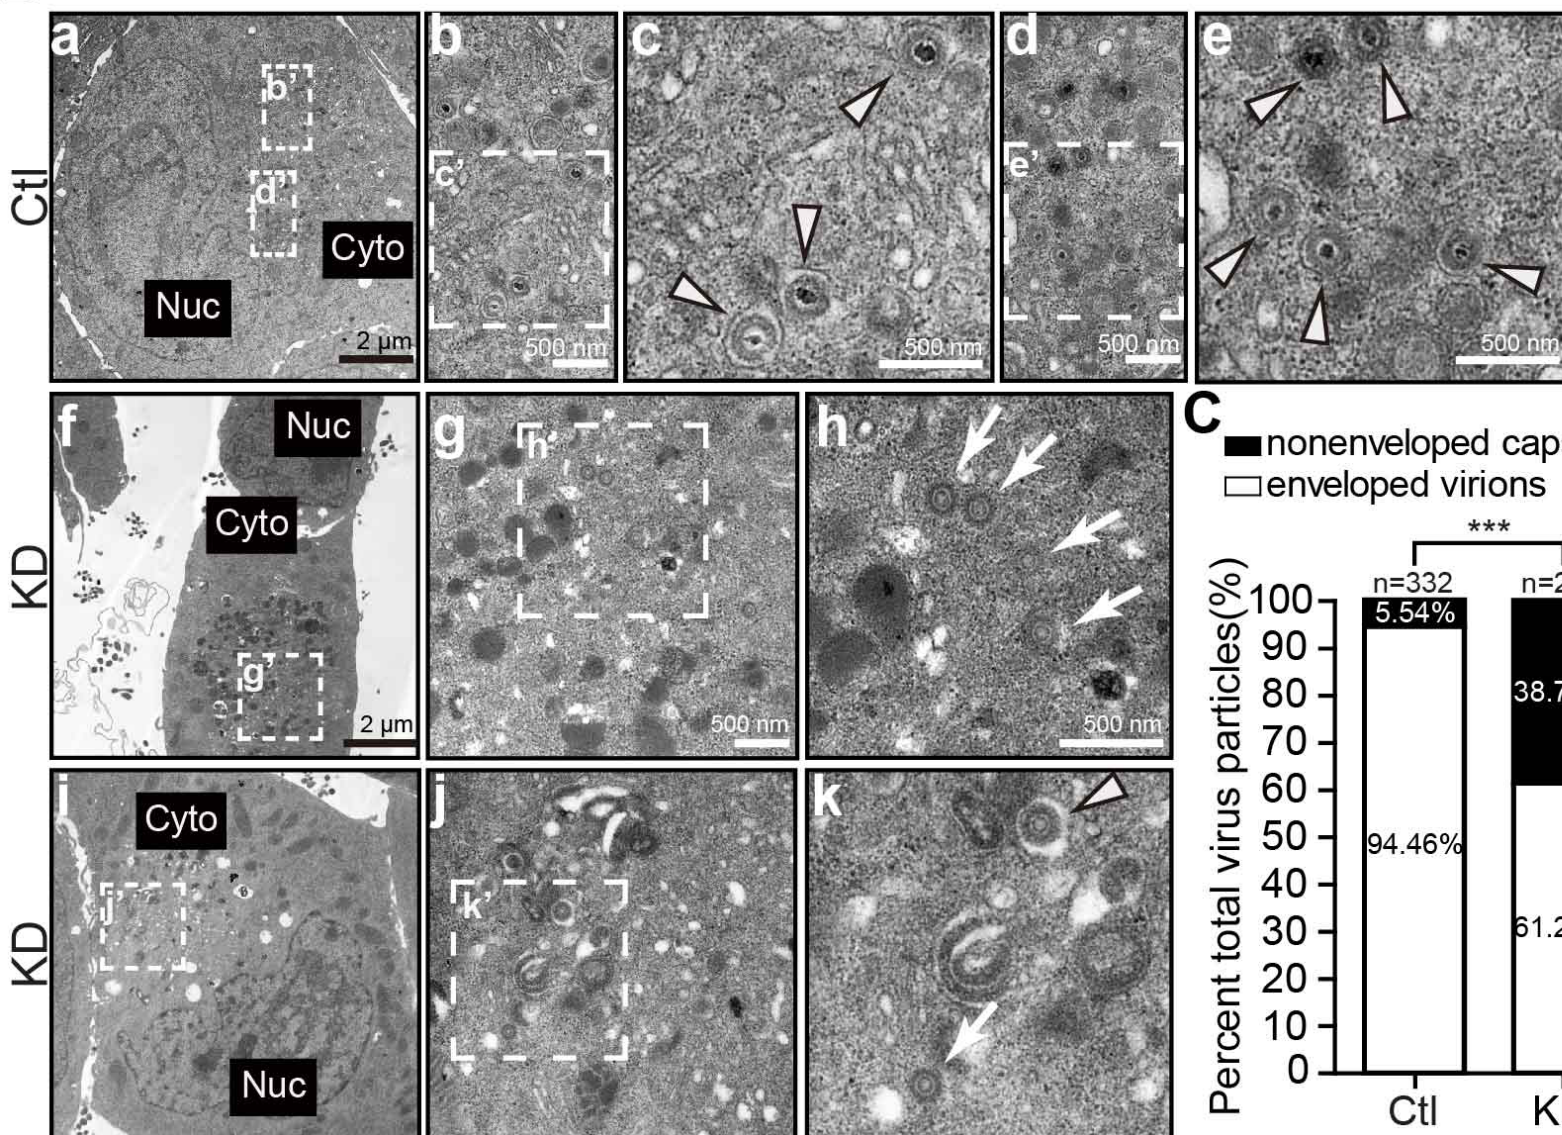

**C**

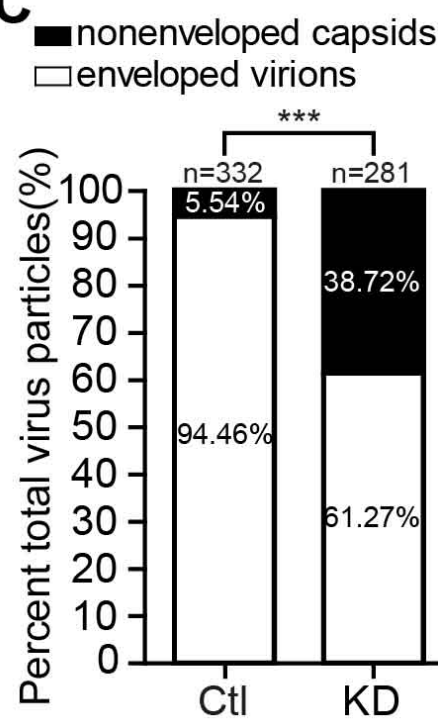



FIG6

A

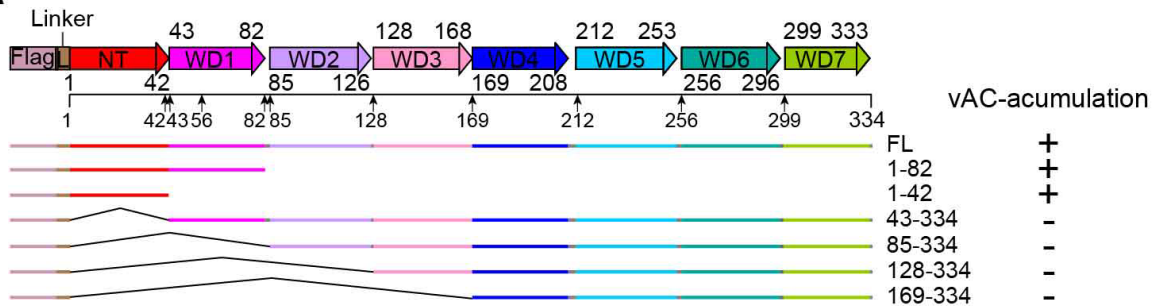

B

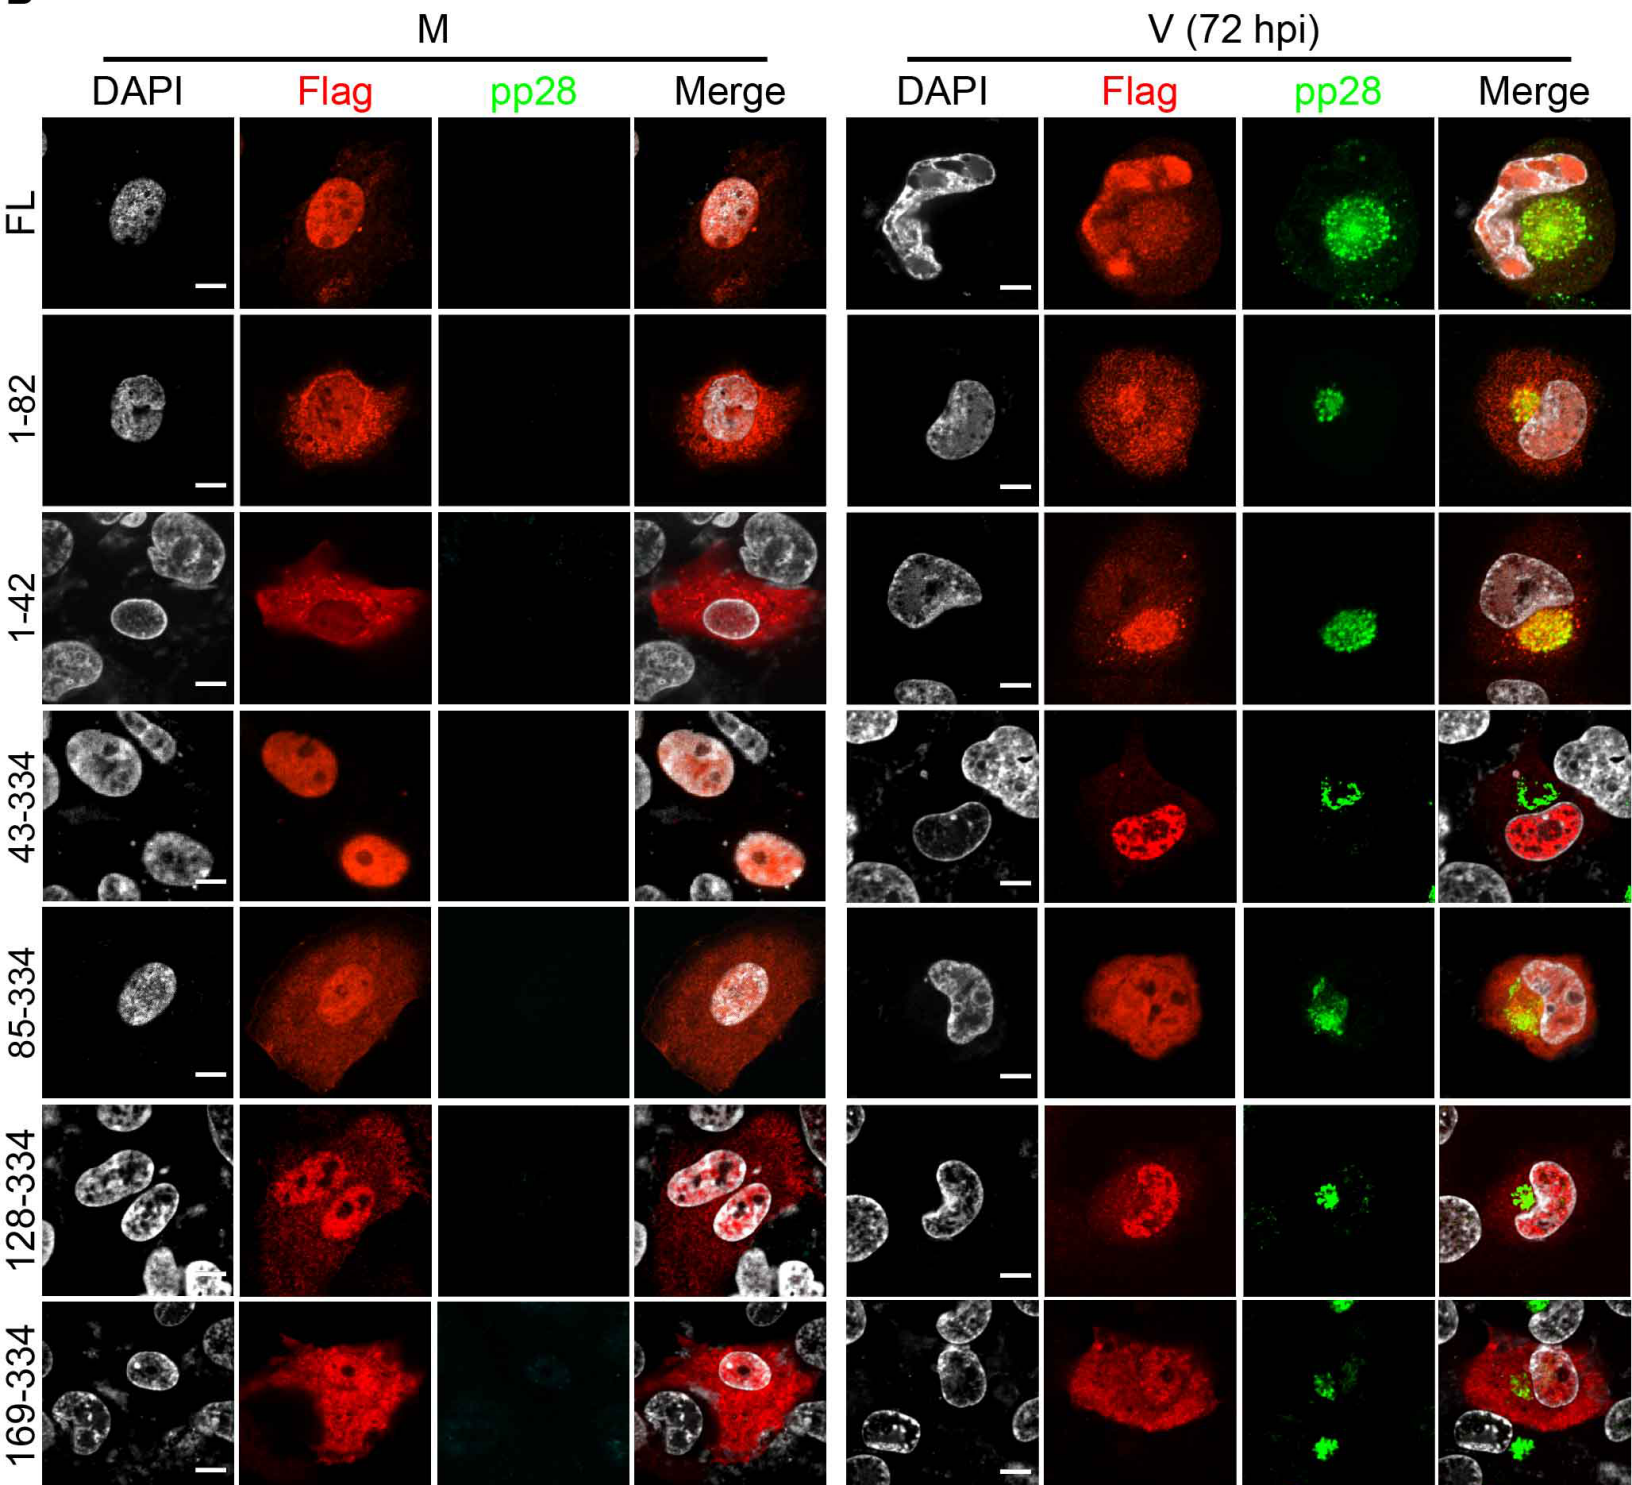

FIG7

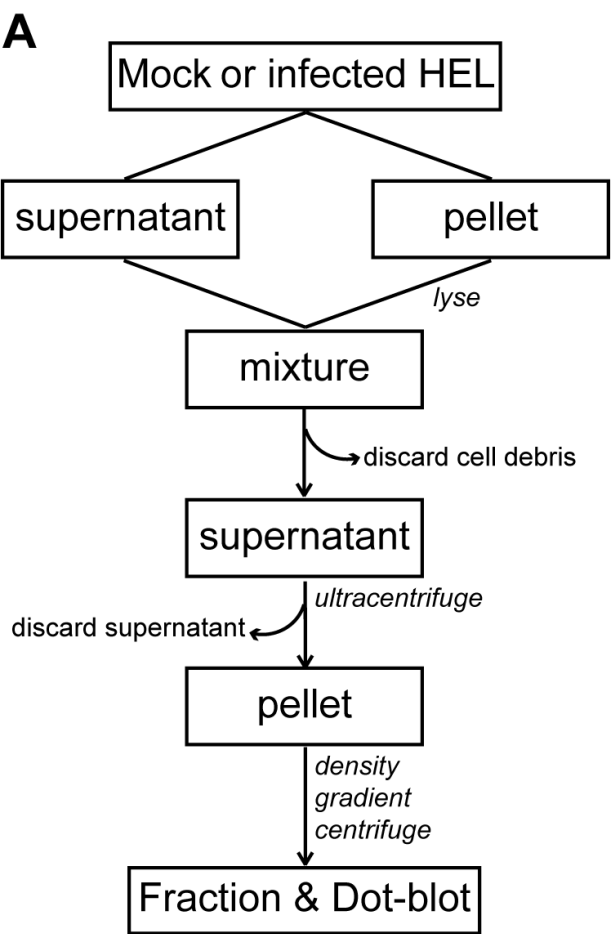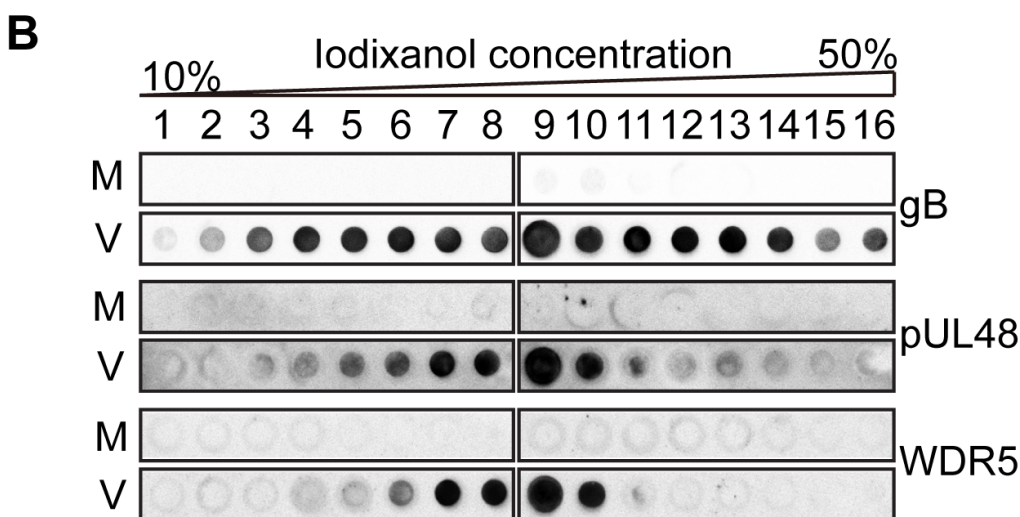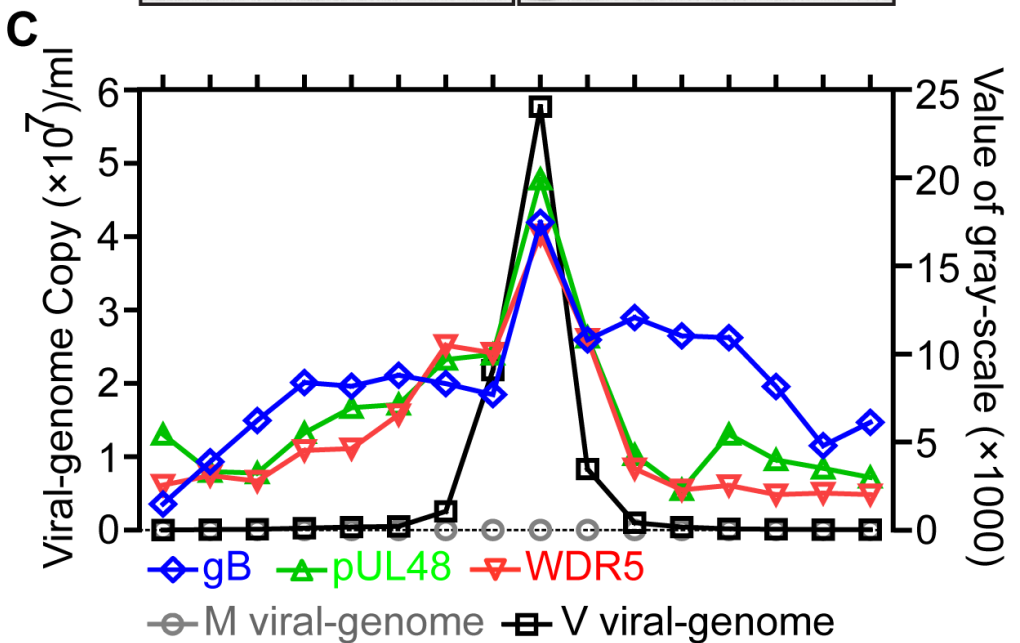

FIG8

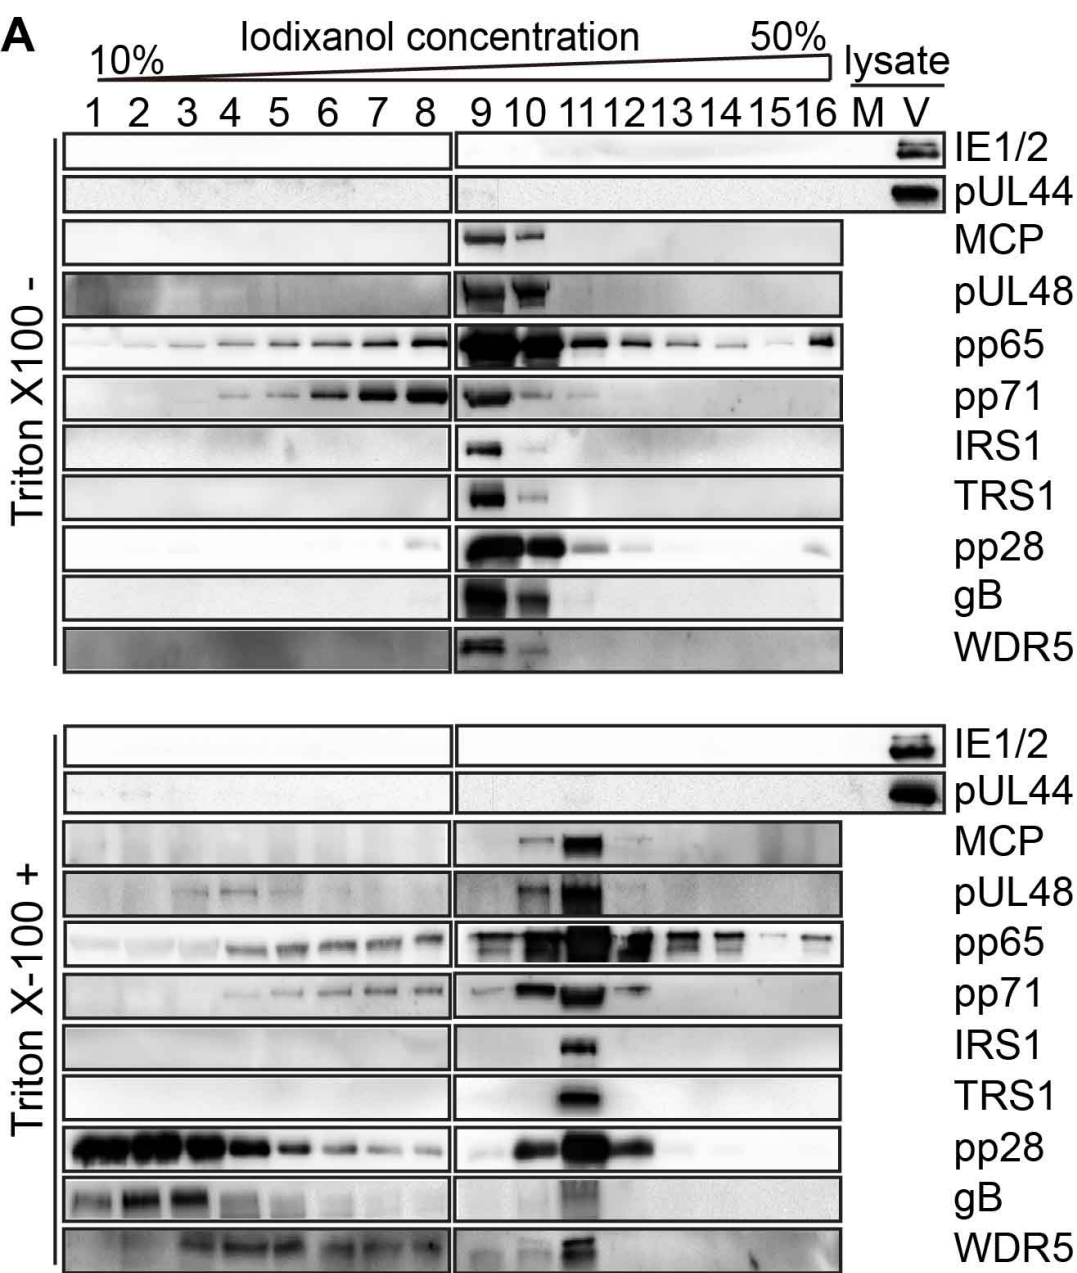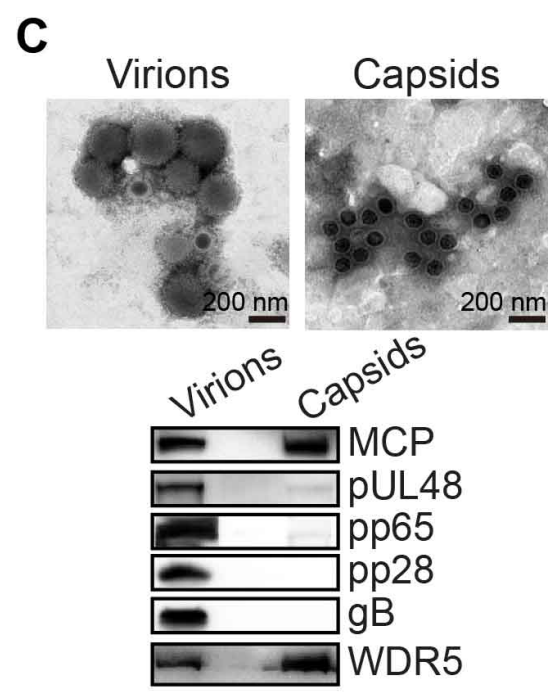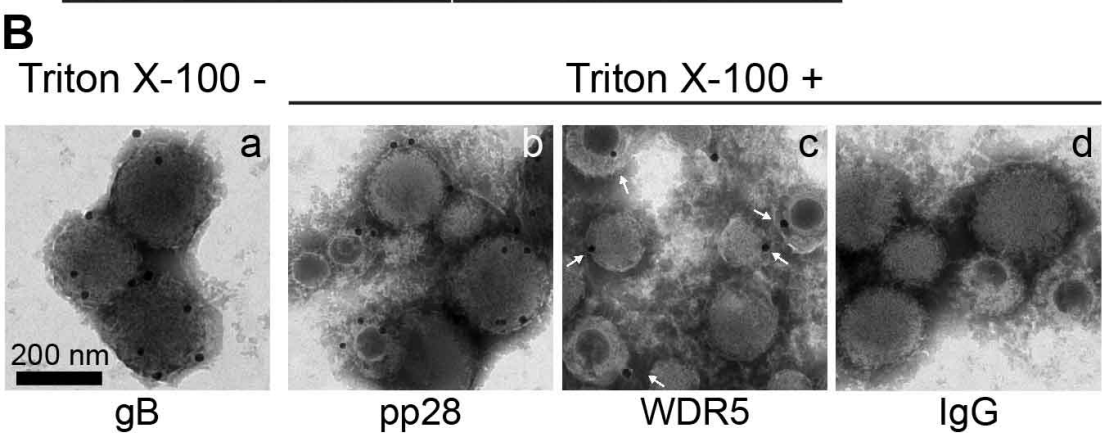



FIG9

**A**

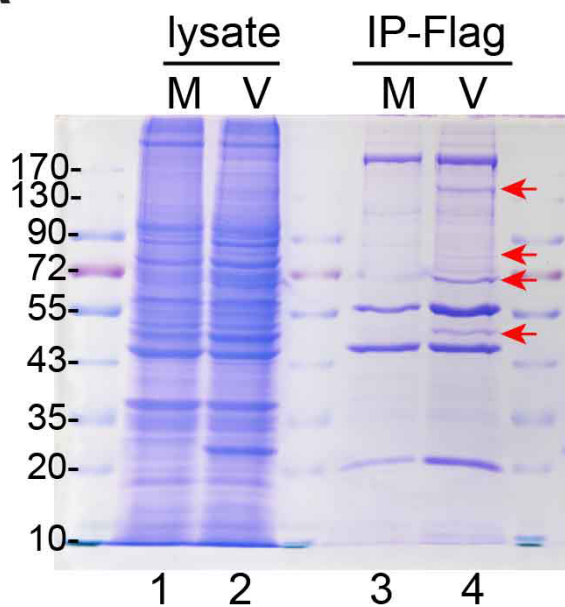

**B**

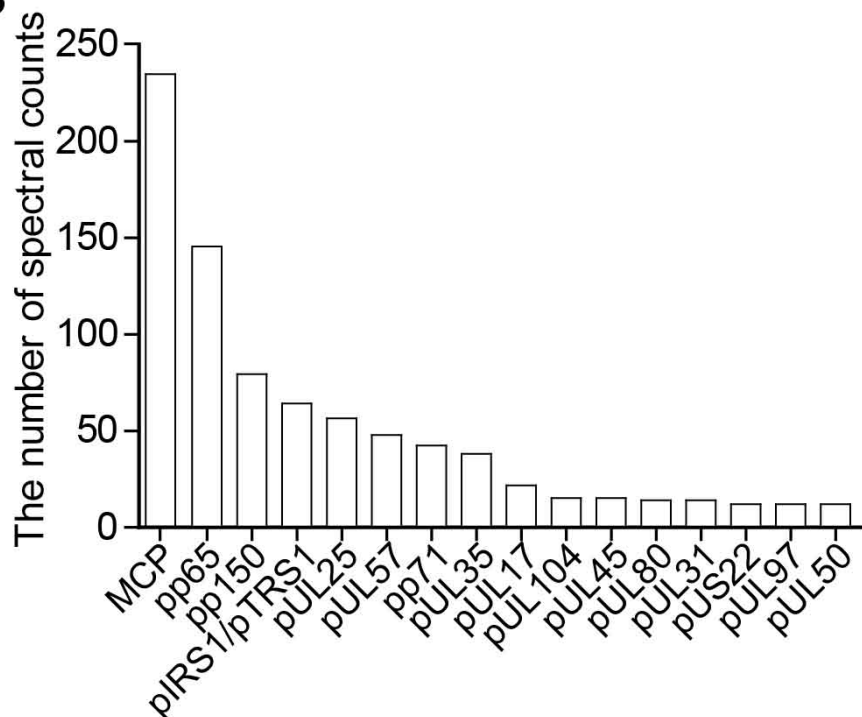

**C**

pp28-His & HA-WDR5

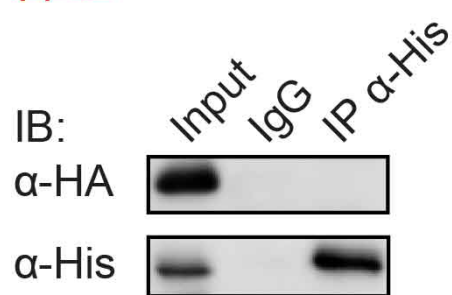

**D**

Myc-MCP & HA-WDR5

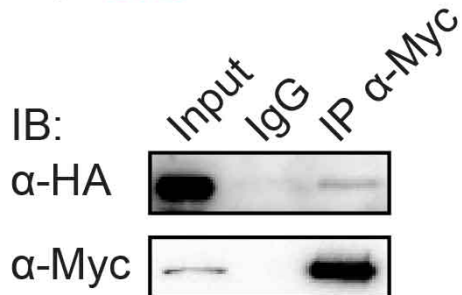

**E**

Flag-pp65 & HA-WDR5

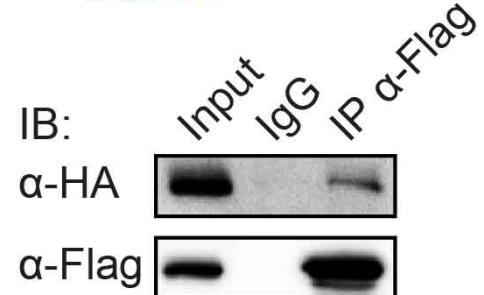

**F**

Myc-pp150 & HA-WDR5

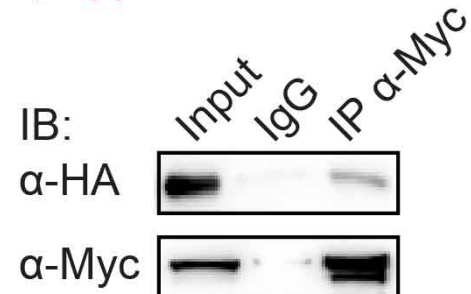

**G**

Flag-pIRS1 & HA-WDR5

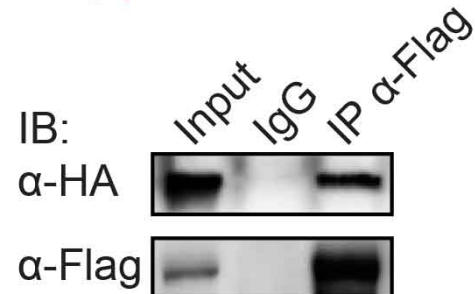

**H**

pTRS1-V5 & HA-WDR5

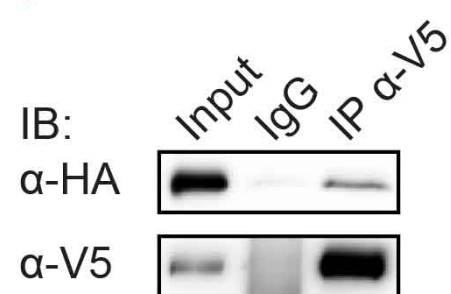

FIG10

# Nucleus

Yang B, et al. J Viral 2018

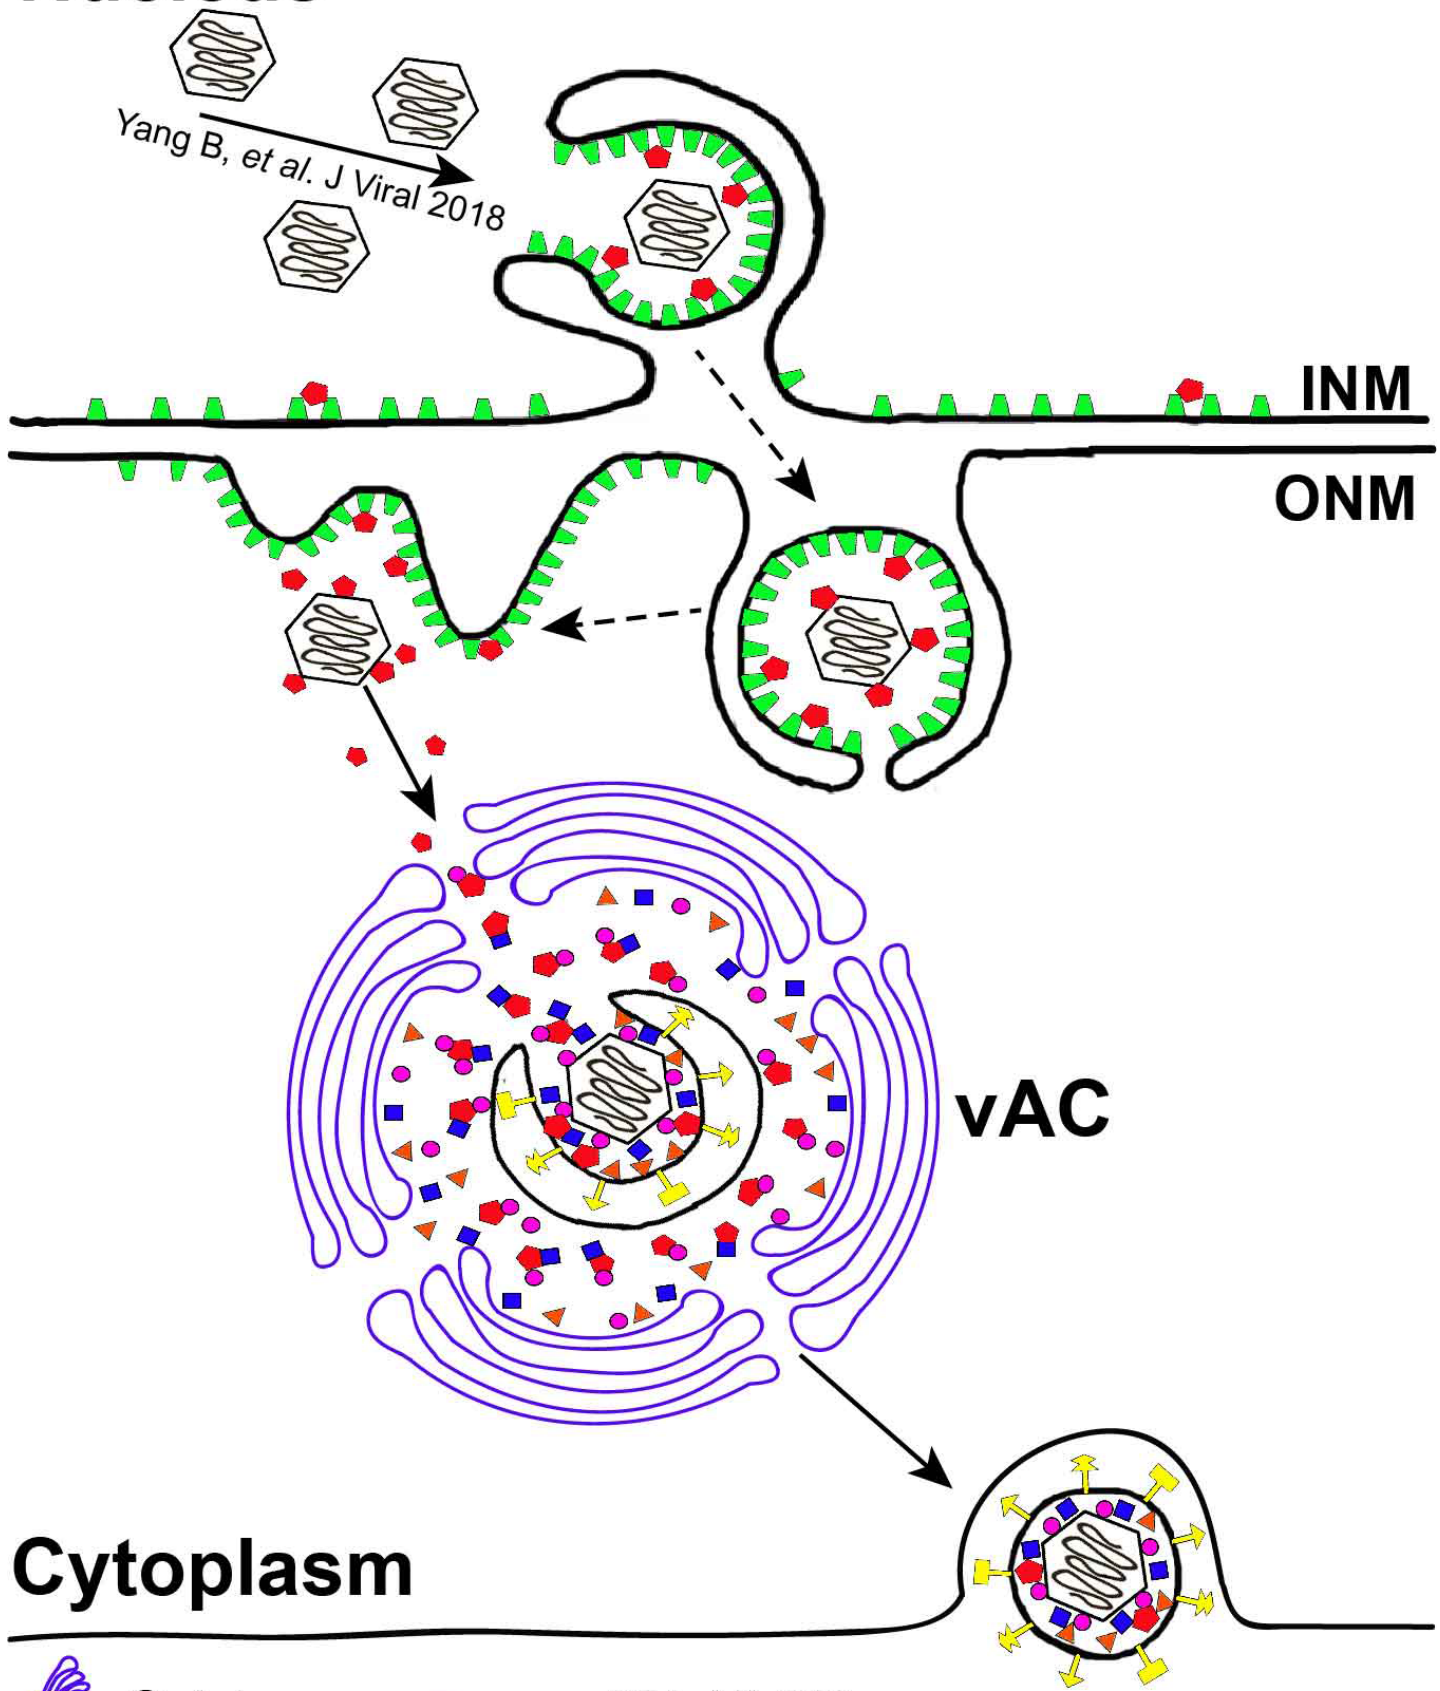

# Cytoplasm

- Golgi
- NEC
- WDR5
- pp65(pUL83)
- Other tegument proteins
- Glycoproteins

**Table 1. Primers used in this study**

| Plasmids   | Primers                                                                                                                       |
|------------|-------------------------------------------------------------------------------------------------------------------------------|
| HA-WDR5    | <b>F</b> 5'- <u>GGAATTC</u> GGATGGCGACGGAGGAGAAGAAGC-3'<br><b>R</b> 5'-CCGCTCGAGTTAGCAGTCACTCTTCCACAGTT-3'                    |
| Flag-WDR5  | <b>F</b> 5'-GCTCTAGAATGGCGACGGAGGAGAAGAAGC-3'<br><b>R</b> 5'- <u>GGAATTC</u> GGCAGTCACTCTTCCACAGTTT-3'                        |
| Flag-pp65  | <b>F</b> 5'-CGGGATCCATGGAGTCGCGCGGTCGCCGTTGTCC-3'<br><b>R</b> 5'-CGGGGTACCTCAACCTCGGTGCTTTTTGGGCG-3'                          |
| pp28-6×his | <b>F</b> 5'-CGGGATCCATGGGTGCCGAACCTTGCAAACG-3'<br><b>R</b> 5'-GCTCTAGACTAAAGGGCAAGGAGGCGGCGG-3'                               |
| Flag-IRS1  | <b>F</b> 5'-CGGGATCCATGGCCCAGCGCAACGGCATGTC-3'<br><b>R</b> 5'-GGGGTACCTCAATGATGAACGTGGTGAGGGGCG-3'                            |
| 6Myc-pp150 | <b>F</b> 5'-GGCGCGGCAGCCGCTTCAAGTTTGCAGTTTATCGGTCTACAGCG-3'<br><b>R</b> 5'-GAGGTTGATTAGGATCTATCGATCTATTCTCCGTGTTCTTAATCTTC-3' |
| 6Myc-MCP   | <b>F</b> 5'-GGCGCGGCAGCCGCTTCAAGAGAACTGGTCGGCGCTCGAGCTCC-3'<br><b>R</b> 5'-GAGGTTGATTAGGATCTATCGATTACAGAGTTAAATAACATGGATTG-3' |

TABLE 2 Primary and Secondary Antibodies Used in IFA and IB.

| Primary Antibody              | Host / Isotype         | Source / Cat.#                                                                    |
|-------------------------------|------------------------|-----------------------------------------------------------------------------------|
| Normal Mouse IgG              | Mouse polyclonal       | Beyotime/A7028                                                                    |
| Epitope tag                   |                        |                                                                                   |
| Flag                          | Mouse monoclonal/IgG1  | Sigma/F3165                                                                       |
| HA                            | Mouse monoclonal/IgG1  | Sigma/H9658                                                                       |
| 6×His                         | Mouse monoclonal/IgG1  | Proteintech/66005-1-Ig                                                            |
| 6×His                         | Rabbit polyclonal      | Abcam/ab9108                                                                      |
| V5                            | Rabbit polyclonal      | Proteintech/14440-1-AP                                                            |
| Myc                           | Mouse monoclonal/IgG1  | Proteintech/66003-2-Ig                                                            |
| Cellular                      |                        |                                                                                   |
| WDR5 (36 KDa)                 | Rabbit polyclonal      | Sigma/07-706                                                                      |
| WDR5 (36 KDa)                 | Mouse monoclonal/IgG2b | Abcam/ab56919                                                                     |
| WDR5 (36 KDa)                 | Mouse monoclonal/IgG2b | Santa Cruz/sc-100895                                                              |
| GAPDH (36 KDa)                | Rabbit polyclonal      | Proteintech/10494-1-AP                                                            |
| GFP (30kDa)                   | Rabbit polyclonal      | Proteintech/50430-2-AP                                                            |
| Lamin B1 (66 KDa)             | Rabbit polyclonal      | Proteintech/12987-1-AP                                                            |
| β-Actin (43 KDa)              | Mouse monoclonal/IgG1  | Proteintech/60008-1-Ig                                                            |
| α-Tubulin (50 KDa)            | Mouse monoclonal/IgG1  | Beyotime/AT819                                                                    |
| γ-Tubulin (48 KDa)            | Mouse monoclonal/IgG1  | Gift from Dr. Yan Zhou in<br>Wuhan University, China                              |
| EEA1 (180 KDa)                | Mouse monoclonal/IgG1  | Abcam/ab70521                                                                     |
| 58K (96 KDa)                  | Mouse monoclonal/IgG1  | Abcam/ab27043                                                                     |
| HCMV                          |                        |                                                                                   |
| IE1(UL123) (72 KDa)           | Mouse monoclonal/IgG2a | (59)                                                                              |
| IE1/2 (UL123/122) (72/86 KDa) | Mouse monoclonal/IgG1  | Virusys/P1215                                                                     |
| pUL44 (ICP36) (46 KDa)        | Mouse monoclonal/IgG1  | Virusys/P1202-1                                                                   |
| gB (UL55) (52 and 105 KDa)    | Mouse monoclonal/IgG1  | Virusys/P1201                                                                     |
| pp71 (UL82) (71 KDa)          | Goat polyclonal        | Santa Cruz/sc-33323                                                               |
| pp65 (UL83) (65 KDa)          | Mouse monoclonal/IgG1  | Virusys/P1205                                                                     |
| pp28 (UL99) (28 KDa)          | Mouse monoclonal/IgG2a | Virusys/CA004-1                                                                   |
| pUL48 (253 KDa)               | Rabbit polyclonal      | Gift from Dr. Wade Gibson in<br>Johns Hopkins University, U.S.                    |
| pIRS1(91 KDa)                 | Mouse monoclonal/IgG1  | (60)<br>Gift from Dr. Thomas E. Shenk<br>in Princeton University, U.S.            |
| pTRS1(84 KDa)                 | Mouse monoclonal/IgG1  | (61)<br>Gift from Dr. Thomas E. Shenk<br>in Princeton University, U.S.            |
| MCP (150KDa)                  | Mouse monoclonal/IgG2a | (61)<br>(62)                                                                      |
| MCMV                          |                        |                                                                                   |
| mIE1 (m123) (89 KDa)          | Mouse Monoclonal/IgG1  | Gift from Dr. Qiyi Tang in<br>Howard University College of<br>Medicine, U.S. (63) |
| Secondary antibody            | Host / Isotype         | Source / Cat.#                                                                    |
| Peroxidase-anti-Mouse IgG     | Goat                   | Jackson ImmunoResearch<br>Laboratories/115-035-003                                |
| Peroxidase-anti-Rabbit IgG    | Goat                   | Jackson ImmunoResearch<br>Laboratories/111-035-003                                |
| Peroxidase-anti-Goat IgG      | Donkey                 | Jackson ImmunoResearch<br>Laboratories/705-035-147                                |
| TRITC-anti-Mouse-IgG2b        | Goat                   | Southern Biotech/1090-03                                                          |
| TRITC-anti-Mouse-IgG2a        | Goat                   | Southern Biotech/1080-03                                                          |
| AF488-anti-Mouse-IgG1         | Goat                   | Thermo Fisher/A-21121                                                             |
| AF488-anti-Mouse-IgG2a        | Goat                   | Thermo Fisher/A-21131                                                             |
| AF647-anti-Mouse-IgG1         | Goat                   | Thermo Fisher/A-21240                                                             |
| AF647-anti-Mouse-IgG2a        | Goat                   | Thermo Fisher/A-21241                                                             |
| 10 nm-gold-anti-mouse-IgG     | Goat                   | Boster/GA1004                                                                     |
